# Reciprocal Control of Motility and Biofilm Formation by the PdhS2

## Two-Component Sensor Kinase of *Agrobacterium tumefaciens*

Jason E. Heindl<sup>1,2</sup>, Daniel Crosby<sup>2</sup>, Sukhdev Brar<sup>2</sup>, Daniel Merenich<sup>2</sup>, Aaron M. Buechlein<sup>3</sup>, Eric L. Bruger<sup>4</sup>, Christopher M. Waters<sup>4</sup> and Clay Fuqua<sup>1\*</sup>

<sup>1</sup>Department of Biology  
Indiana University  
Bloomington, IN 47405, USA

<sup>2</sup>Department of Biological Sciences  
University of the Sciences  
Philadelphia, PA 19104, USA

<sup>3</sup>Center for Genomics and Bioinformatics  
Indiana University  
Bloomington, IN 47405

<sup>4</sup>Department of Microbiology and Molecular Genetics  
Michigan State University  
East Lansing, MI 48824, USA

24

25 Running title: *Agrobacterium* PdhS2 regulates motility and biofilms

26 Keywords: Development, sensor kinase, phosphorelay, *Agrobacterium tumefaciens*,

27 biofilm, motility

28 \*Address for correspondence: Clay Fuqua, Dept. Biol., 1001 E. 3rd St., Jordan Hall 142,

29 Indiana Univ., Bloomington, IN 47405-1847. Tel: 812-856-6005, FAX: 812-855-6705, E-

30 mail: [cfuqua@indiana.edu](mailto:cfuqua@indiana.edu)

31

32 [Current addresses: J.E.H., Dept. Biol. Sci., Univ. Sci, Philadelphia, PA](#)

33

## ABSTRACT

A core phosphorelay pathway that directs developmental transitions and cellular asymmetries in *Agrobacterium tumefaciens* putatively includes two overlapping, integrated phosphorelays. One of these phosphorelays putatively includes at least four histidine sensor kinase homologues, DivJ, PleC, PdhS1, and PdhS2, and at least two response regulators, DivK and PleD. Previously we demonstrated that PdhS2 reciprocally regulates biofilm formation and swimming motility. In the current study we further dissect the role and regulatory impact of PdhS2 in *A. tumefaciens* revealing that PdhS2-dependent effects on attachment and motility require the response regulator, DivK, but do not require PdhS2 autokinase or phosphotransfer activities. We also demonstrate that PdhS2 regulation of biofilm formation is dependent upon multiple diguanylate cyclases, including PleD, DgcA, and DgcB, implying that PdhS2 regulation of this process intersects with pathways regulating levels of the second messenger cyclic diguanylate monophosphate (cdGMP). Finally, we show that upon cell division a GFP fusion to PdhS2 dynamically localizes to the new pole of the bacterium suggesting that PdhS2 controls processes in the daughter cell compartment of predivisional cells. These observations suggest that PdhS2 negatively regulates DivK, and possibly PleD, activity to control developmental processes in the daughter cell compartment of predivisional cells, as well as in newly released motile daughter cells.

## IMPORTANCE

Bacterial developmental processes, including morphological transformations as well as behavioral transitions, are tightly regulated. In many Alphaproteobacteria cell division and development are coordinated by a suite of conserved histidine kinases and their partnered regulatory proteins. Here we describe how the histidine kinase PdhS2 genetically interacts with a single-domain response regulator, DivK, and the intracellular signal cyclic diguanylate monophosphate. PdhS2 dynamically localizes to the new pole of recently divided cells and negatively regulates processes that ultimately lead to attachment and subsequent biofilm formation in *Agrobacterium tumefaciens*. These findings expand our understanding of the links between cell division and developmental control in *A. tumefaciens* and related Alphaproteobacteria.

## INTRODUCTION

Bacteria are sometimes considered to be elementary life forms, with simple body plans, streamlined reproductive cycles, and monolithic behavior when compared with higher eukaryotes. To the contrary, many bacteria can exhibit a remarkable diversity of developmental complexity, both temporal and morphological (1, 2). Even bacterial species whose cells appear morphologically uniform, such as rod-shaped *Escherichia coli* or coccoid *Staphylococcus aureus*, possess distinct cellular architectures as well as intricately timed cell division programs, and a large number of bacteria can form multicellular biofilms (3, 4). Developmental processes in bacteria, as in higher eukaryotes, are driven by factors that may be considered both cell-intrinsic and cell-extrinsic. Intrinsic factors include genomic and proteomic content, while extrinsic factors comprise environmental conditions, such as pH and temperature, which cells sense and to which they respond (5).

Members of the Alphaproteobacteria class include host-associated pathogens (e.g. *Brucella* sp., *Bartonella* sp.), host-associated commensals (e.g. *Sinorhizobium* sp., *Bradyrhizobium* sp.), and free-living aquatic bacteria (e.g. *Caulobacter* sp., *Rhodobacter* sp.). Recent work has revealed that several Alphaproteobacteria divide asymmetrically, in which cells elongate, duplicate and segregate their genomic content between two non-equivalent compartments of predivisional cells, and finally generate two cells by cytokinesis (6, 7). Notably, cellular components are unevenly distributed between the two daughter cells during cell division, including surface structures (e.g. flagella and holdfasts), cell wall components (e.g. peptidoglycan), and even cytoplasmic complexes (e.g. heat shock proteins). For example, there may be a clear segregation of existing

organelles to one daughter cell while the second cell generates these structures *de novo* (6, 8-10). Although the specific details may vary among species, the end result is the production of a young daughter cell and a comparatively older mother cell. Not only does this uneven division partition senescence among the products of cell division, but it also allows for the generation of functionally distinct cell types. For example, in *Caulobacter crescentus* the non-motile stalked cell type can attach to surfaces using its polar adhesin called the holdfast (11). This stalked cell then serves as the mother cell during multiple rounds of cell division, generating and releasing motile swarmer cells upon each cytokinetic event (12). Motile swarmer cells are prohibited from entering the cell division cycle until differentiation into the non-motile stalked form (13, 14).

Underlying asymmetric cell division is subcellular differentiation that includes localization of specific regulatory proteins to programmed locations within each cell (15). Prominent among these are components of two overlapping phosphorelays, the first which functions through the response regulators DivK and PleD (the DivK-PleD relay) and the second which functions primarily through the response regulator CtrA (the CtrA relay). The pathways are connected through DivK, which controls initiation of the CtrA relay by regulating the CckA sensor kinase (16, 17). Collectively we refer to these two relays as the DivK-CtrA pathway. In *C. crescentus* the sensor histidine kinases PleC and DivJ control the phosphorylation state of DivK and PleD, and localize to opposing poles of the predivisional cell (18-21). Through antagonistic kinase and phosphatase activities on the same target proteins, DivK and PleD, PleC and DivJ inversely manifest their activity on the most downstream component of the DivK-CtrA pathway, the response regulator CtrA (22-25). DivJ is retained at the stalked cell pole and serves as

a DivK/PleD kinase, resulting in increased DivK~P concentration and decreased CtrA~P concentration in this region of the cell (Fig. 1A). Conversely, PleC localizes to the pole distal to the stalk, where the single polar flagellum is assembled, and where PleC dephosphorylates DivK, leading downstream to increased CtrA~P levels and activity. Phospho-CtrA binds to the replication origin thereby preventing DNA replication and also acts as a transcriptional regulator for many genes, including activating those for assembly of the flagella (26-28). The CtrA relay is also influenced by the DivK-PleD relay through levels of the second messenger cyclic diguanylate monophosphate (cdGMP). DivJ-dependent phosphorylation of PleD at the stalk pole of the predivisional cell stimulates its diguanylate cyclase activity, resulting in higher levels of cdGMP at this end of the cell. The CckA kinase that initiates the CtrA relay is biased away from its kinase and towards its phosphatase activity by direct allosteric control through high levels of cdGMP, thereby reinforcing a CtrA~P gradient, relatively low at the stalk pole and increasing towards the distal pole (29-34) (Fig. 1A).

*Agrobacterium tumefaciens* is a plant pathogen of the Alphaproteobacteria group that is not stalked, but like *C. crescentus*, divides asymmetrically generating a motile daughter cell from a mother cell (6). As a facultative pathogen, the *A. tumefaciens* lifestyle substantially differs from that of the freshwater oligotroph *C. crescentus*. Nonetheless core components of the DivK-CtrA pathway are well conserved in *A. tumefaciens*, including the three non-essential PleC/DivJ homologue sensor kinase (PdhS) homologues PleC (Atu0982), PdhS1 (Atu0614), and PdhS2 (Atu1888). The *divJ* gene (Atu0921) is essential in *A. tumefaciens* (35, 36) (Fig. 1B). We have previously shown that the three non-essential PdhS homologues have distinct roles in the normal

cellular development of *A. tumefaciens* (Kim, 2013). PleC and PdhS1, as well as the *A. tumefaciens* DivK homologue, all manifested marked effects on both cell division and complex behaviors including motility and biofilm formation. In genetic backgrounds with reduced or absent levels of these proteins cells are elongated and branched, and these strains also exhibit both reduced motility and reduced biofilm formation. To date the essentiality of *divJ* has precluded exhaustive phenotypic analysis (35) although preliminary depletion studies suggest it similarly impacts these same phenotypes (Heindl et al. in prep). The fourth PdhS family member, PdhS2, does not appear to participate in regulation of cell division as all cells are morphologically wild-type in appearance (35). Loss of PdhS2, however, results in dramatically increased attachment and biofilm formation and simultaneous loss of motility. Reciprocal regulation of these phenotypes is often a hallmark of regulation by cdGMP (37). In this work we further explore the mechanism by which PdhS2 regulates adhesion and motility. Our results link DivK downstream of PdhS2. We also show a clear intersection of PdhS2 activity and the activity of several diguanylate cyclases, suggesting that PdhS2 and cdGMP coordinately regulate biofilm formation and motility in *A. tumefaciens*. Finally, we find that PdhS2 dynamically localizes to the newly generated poles of both the new daughter cell and the mother cell following cytokinesis. This pattern suggests that PdhS2 activity is specifically required for proper development of motile daughter cells.



## RESULTS

**DivK is epistatic to PdhS2.** Members of the PdhS family of sensor kinases were originally identified based on homology with their namesakes DivJ and PleC of *C. crescentus* (38, 39) (Fig. 1B). Based on this homology all PdhS family members are predicted to interact with the single domain response regulator DivK (39) and also interact with the diguanylate cyclase response regulator PleD. Prior work from our laboratory has shown that both swimming motility and adherent biomass are diminished in the  $\Delta divK$  mutant, implying that DivK activity is required for proper regulation of these phenotypes in *A. tumefaciens* (35). In contrast, the PdhS-type kinase PdhS2 inversely regulates these phenotypes; a  $\Delta pdhS2$  mutant is non-motile but hyperadherent (35). To determine whether PdhS2 genetically interacts with DivK we constructed a  $\Delta divK \Delta pdhS2$  mutant and compared swimming motility and biofilm formation in this strain to wild-type and parental single deletion strains (Fig. 2A). As seen before, loss of either *divK* or *pdhS2* reduced swimming motility as measured by swim ring diameter on motility agar. Biofilm formation on PVC coverslips in the  $\Delta divK$  mutant was reduced relative to the wild-type C58 strain while for the  $\Delta pdhS2$  mutant it was dramatically increased. The  $\Delta divK \Delta pdhS2$  mutant phenocopied the  $\Delta divK$  mutant in both assays, with no significant difference in the efficiency of either swimming motility or biofilm formation between the two strains.

Swim ring diameters of the  $\Delta divK$  and  $\Delta divK \Delta pdhS2$  mutants were decreased by roughly 20% compared to wildtype while the decrease in  $\Delta pdhS2$  swim ring diameters was roughly 40% compared to wildtype, suggesting that the nature of the defect in swimming motility differs between these two classes of mutants and that loss of *divK*

partially restores motility in the absence of *pdhS2*. Indeed, it was earlier noted that while both the  $\Delta divK$  and the  $\Delta pdhS2$  single deletion mutants produce polar flagella few  $\Delta pdhS2$  mutant bacteria were observed to be motile under wet-mount microscopy implying that the swimming defect is due to diminished flagellar activity rather than flagellar assembly (35). The  $\Delta divK$  mutant, however, was readily observed to be motile under wet-mount microscopy. Similarly, the  $\Delta divK \Delta pdhS2$  mutant generates polar flagella and its motility is readily observed under wet-mount microscopy (data not shown). Both the  $\Delta divK$  and  $\Delta divK \Delta pdhS2$  mutants, and not the  $\Delta pdhS2$  mutant, generate aberrant cell morphologies including elongated and branched cells (35) (Data not shown). These data support the hypothesis that PdhS2 interacts with DivK and that the phenotypes of the  $\Delta pdhS2$  mutant are at least partly due to altered regulation of DivK activity. Moreover, the reciprocal nature of the phenotypes between the  $\Delta divK$  and  $\Delta pdhS2$  mutants implies that PdhS2 negatively regulates DivK.

Further support for PdhS2 activity proceeding through DivK was provided by expressing wild-type PdhS2 ectopically from a  $P_{lac}$  promoter. Induced expression of *pdhS2* rescues swimming motility and returns biofilm formation closer to wild type levels in the  $\Delta pdhS2$  mutant, albeit incompletely (Fig. 2B). However, as predicted from the  $\Delta divK \Delta pdhS2$  phenotypes, plasmid-borne provision of PdhS2 in the  $\Delta divK$  mutant had no significant effect on either biofilm formation or swimming motility (Fig. 2C).

**PdhS2 kinase and phosphatase activities coordinately regulate developmental phenotypes.** Members of the PdhS family of sensor histidine kinases contain a conserved HATPase\_c catalytic domain at their carboxyl termini and an upstream

conserved HisKA dimerization/phosphoacceptor domain (Fig. 1C). Many sensor kinases exhibit bifunctional catalytic activity, alternately acting as kinase or phosphatase, and in *C. crescentus* PleC is one such example (18, 22, 40). Multiple sequence alignment of the HisKA domain from the *A. tumefaciens* and *C. crescentus* PdhS family kinase homologues highlights the high level of conservation of this domain including the phospho-accepting histidine residue (H271 of PdhS2) and a threonine residue important for phosphatase activity (T275 of PdhS2) (Fig. 1B).

To test the requirement of the conserved phospho-accepting histidine for PdhS2 activity we mutated this residue to alanine (H271A) and evaluated the ability of this mutant *pdhS2* allele to complement  $\Delta pdhS2$  phenotypes (Fig. 2B). Ectopic expression of PdhS2<sup>H271A</sup> ( $P_{lac}$ -*pdhS2* on a low copy plasmid) efficiently complemented the attachment and motility phenotypes of the  $\Delta pdhS2$  mutant. These data indicate that this histidine residue is not required for PdhS2 regulation of swimming motility and biofilm formation, and imply that PdhS2 autokinase and phosphotransfer are not required to regulate these phenotypes. Instead, we hypothesize that PdhS2 acts primarily as a phosphatase towards its cognate response regulators, including DivK.

The conserved HisKA dimerization/phosphoacceptor domain is also primarily responsible for the phosphatase activity of these two-component system kinases (41). Phosphatase activity requires a conserved threonine residue roughly one  $\alpha$ -helical turn (4 residues) downstream of the phospho-accepting histidine residue. To test the requirement for PdhS2 phosphatase activity in regulating developmental phenotypes we mutated this conserved threonine residue to alanine (Thr275A) and evaluated the ability of this mutant *pdhS2* allele to complement  $\Delta pdhS2$  phenotypes. In contrast to the

PdhS2<sup>H271A</sup> mutant protein, equivalent ectopic expression of the PdhS2<sup>T275A</sup> allele failed to complement the  $\Delta pdhS2$  motility and attachment phenotypes, and in fact exacerbated them (Fig. 2B). Expression of either the kinase-null or the phosphatase-null allele of PdhS2 in the  $\Delta divK$  background had no effect on biofilm formation or swimming motility (Fig. 2C). A PdhS2 double mutant with both the histidine and threonine residues mutated had no effect on biofilm formation or swimming motility (Fig. S1). Together these data are most consistent with the hypothesis that PdhS2 phosphatase activity is primarily responsible for regulating these phenotypes in *A. tumefaciens*. The data are also consistent with PdhS2 negatively regulating DivK, and DivK being downstream of PdhS2 in the DivK-CtrA pathway. In wild-type *A. tumefaciens* induced expression of PdhS2 modestly but significantly increases biofilm formation and decreases swimming motility (Fig. 2B). Induced expression of the PdhS2<sup>H271A</sup> protein in the wild-type background, however, significantly reduces biofilm formation. These data suggest that PdhS2 kinase activity may also play a role during the normal life cycle of *A. tumefaciens* and that the balance of PdhS2 kinase and phosphatase activities is coordinated to match dynamic cellular conditions.

**PdhS2 and DivJ localize to the pole of *A. tumefaciens*.** One mechanism for establishing and maintaining developmental asymmetries in bacteria is the differential polar localization of proteins with opposing functionalities (42, 43). Several members of the PdhS family of sensor kinases localize to one or both bacterial poles (18, 22, 44). Using a full length PdhS2-GFP fusion that retains wild type functionality we tracked localization of PdhS2 in *A. tumefaciens* following induction of expression with IPTG (Fig.

3A and Movie S1). In both wild-type and  $\Delta pdhS2$  backgrounds PdhS2-GFP localized primarily to the budding pole of predivisional cells. Time-lapse microscopy of the  $\Delta pdhS2$  mutant expressing PdhS2-GFP revealed apparent dynamic relocation of PdhS2-GFP to the newly generated pole of the daughter cell coincident with cytokinesis. In the mother cell a new focus of PdhS2-GFP subsequently accumulates at the new budding pole generated following septation and daughter cell release. These time-lapse experiments clearly indicate that PdhS2-GFP localizes to the actively budding pole of the cell, and is lost at that pole as it matures and the cell proceeds to the predivisional state. Following cytokinesis PdhS2-GFP localizes to the newly generated, younger poles of both the daughter cell and the mother cell. This dynamic localization is consistent with PdhS2 activity being restricted to the motile-cell compartment of predivisional cells and to newly generated motile cells.

Since PdhS2 localizes to the budding pole of dividing cells and primarily requires its phosphatase activity there likely exist one or more non-budding pole-localized kinases opposing PdhS2 activity. The most obvious candidate for this activity is DivJ. DivJ localizes to the old pole in *C. crescentus* and acts as a DivK kinase in both *C. crescentus* and *S. meliloti* (39, 45). Time-lapse microscopy of a full length DivJ-GFP fusion in wild-type *A. tumefaciens* reveals localization to the non-budding pole in mother cells that is not redistributed over the course of multiple cell division cycles (Fig. 3B and Movie S2). The interplay between PdhS2 and DivJ is a topic of current study, one made difficult by the essential nature of *divJ*. The remaining PdhS kinases also likely affect DivK or PleD activity. Localization patterns for PdhS1 and PleC have not been determined. However, phenotypic evaluation of *pdhS1*, *pdhS2*, and *pleC* double and

triple mutants reveals complicated and non-redundant regulation of biofilm formation by these PdhS kinases (Fig. S2).

**PdhS2 and DivK affect CtrA activity.** To determine the effect of PdhS2 and DivK activity on CtrA activity and stability in *A. tumefaciens* we evaluated its steady-state levels and turnover in unsynchronized cells. Steady-state levels of CtrA protein measured in stationary phase cultures were modestly increased in the  $\Delta pdhS2$  background and modestly decreased in the  $\Delta divK$  background, consistent with PdhS2 and DivK inversely regulating CtrA accumulation or stability (Fig. 4A). Because steady-state protein levels reflect the balance between protein synthesis and degradation CtrA protein stability was evaluated following treatment of cultures with chloramphenicol to inhibit translation. In wild-type cultures, translation inhibition leads to a decline in CtrA abundance over the course of 2-3 hours, diminishing to roughly 30% of the steady-state levels. Loss of *pdhS2* had no effect on either final steady-state levels of CtrA following inhibition of translation or the observed rate of turnover when compared with wild-type cultures (Fig. 4B). Taken together these data suggest that PdhS2 and DivK are likely to primarily affect CtrA activity or accumulation rather than CtrA stability.

In *C. crescentus*, CtrA is known to directly regulate at least 55 operons, acting as either an activator or repressor of transcription (22, 28). *A. tumefaciens* CtrA is predicted to act similarly to *C. crescentus* CtrA, binding to DNA in a phosphorylation-dependent manner and regulating DNA replication and transcription. *A. tumefaciens* CtrA is 84% identical to *C. crescentus* CtrA at the amino acid level and purified *C. crescentus* CtrA binds to a site upstream of the *A. tumefaciens* *ccrM* gene (46).

Furthermore, computational analysis of multiple Alphaproteobacterial genomes uncovered numerous cell cycle regulated genes preceded by a consensus CtrA binding site (47). We therefore evaluated CtrA activity by determining the transcriptional activity of several known and hypothesized CtrA-dependent promoters from both *C. crescentus* and *A. tumefaciens*. The *ccrM*, *ctrA*, and *pilA* promoters from *C. crescentus* were chosen to represent CtrA-activated promoters that we predicted would be similarly regulated in *A. tumefaciens* (13, 14, 48, 49). In the  $\Delta pdhS2$  background, expression levels from both the *ctrA* and *pilA* promoters from *C. crescentus* were significantly reduced while transcription from the *C. crescentus ccrM* promoter was unchanged (Table 1). In the *A. tumefaciens*  $\Delta divK$  background the *C. crescentus ccrM* and *ctrA* promoters exhibited increased activity while the *pilA* promoter was unchanged (Table 1). These data are largely consistent with *A. tumefaciens* CtrA regulating transcription of known CtrA-dependent promoters, and with PdhS2 and DivK inversely regulating CtrA activity in *A. tumefaciens*.

From *A. tumefaciens* the *ccrM* promoter is the only promoter for which experimental data suggest CtrA-dependent regulation, thus this promoter was selected for analysis (46). Curiously, the same computational analysis that identified possible CtrA-dependent promoters among a suite of Alphaproteobacterial genomes failed to find a significant CtrA binding motif upstream of the *A. tumefaciens ccrM* gene (47). In addition to *ccrM*, putative promoters for *ctrA* and *pdhS1* were selected for analysis based on the presence of at least one predicted CtrA binding site as well as hypothesized cell cycle regulation of these loci. Transcriptional activity from the *A. tumefaciens ctrA* and *pdhS1* promoter constructs showed inverse regulation in the

$\Delta pdhS2$  and  $\Delta divK$  backgrounds, with expression decreased from the *ctrA* promoter and increased at the *pdhS1* promoter in the  $\Delta pdhS2$  mutant, and exactly reversed in the  $\Delta divK$  mutant. Although absence of *pdhS2* had little effect on the *A. tumefaciens ccrM* promoter, transcription from this promoter was significantly increased in the  $\Delta divK$  background (Table 1). These data are congruent with the above data for *C. crescentus* CtrA-dependent promoters and further support CtrA regulation of cell cycle-responsive genes in *A. tumefaciens*.

**PdhS2 activity intersects with cyclic-di-GMP pools.** In *C. crescentus* DivJ and PleC positively regulate, via phosphorylation, a second response regulator, PleD, as well as DivK (22). In *C. crescentus* and *A. tumefaciens* the *divK* and *pleD* coding sequences form one operon and transcriptional regulation of both genes is linked. Since PdhS kinases are predicted to interact with both DivK and PleD we analyzed the effect of loss of PleD activity in the  $\Delta pdhS2$  background. As reported previously, deletion of *pleD* alone has minimal effect on either swimming motility or adherent biomass (35). Loss of *pleD* in the  $\Delta pdhS2$  background had only a minor effect on swimming motility (Fig. S3A). Adherent biomass, however, was reduced by approximately 30%, indicating that PleD contributes to the increased attachment phenotype of the  $\Delta pdhS2$  mutant (Fig. 5A).

PleD is a GGDEF motif-containing diguanylate cyclase, and thus it is likely that the attachment phenotype of the  $\Delta pdhS2$  mutant requires increased levels of cdGMP. Earlier work from our lab identified three additional diguanylate cyclases that are relevant to attachment and biofilm formation: DgcA, DgcB, and DgcC (50) (Wang



unpublished). As seen in wild-type C58, deletion of *dgcA* or *dgcB* in the  $\Delta pdhS2$  background significantly decreased attachment and biofilm formation, whereas loss of *dgcC* did not (Fig. 5A). These data suggest that increased biofilm formation by the  $\Delta pdhS2$  mutant is dependent on cdGMP pools, generated through PleD, DgcA, and DgcB. Swimming motility was equivalent in either wild-type C58 or  $\Delta pdhS2$  backgrounds in combination with mutations in *pleD*, *dgcA*, *dgcB*, or *dgcC* (Fig. S3A).

Previously we found that mutants lacking either *dgcA*, *dgcB*, or *dgcC* show no difference in average levels of cdGMP (50). Nonetheless, loss of either *dgcA* or *dgcB*, or mutation of the GGDEF catalytic site of either enzyme, significantly reduced biofilm formation (50), implicating these enzymes in controlling the pool of cdGMP, and affecting attachment. We compared cytoplasmic cdGMP levels among wild-type C58, the  $\Delta pdhS2$  mutant, and the  $\Delta pdhS2 \Delta dgcB$  mutant strain and found no change in these levels (Fig. S4). To verify that the diguanylate cyclase (DGC) activity is responsible for the increased biofilm formation in the  $\Delta pdhS2$  background we expressed an allele of *dgcB* with a mutation in its GGDEF catalytic motif (GGAAF; *dgcB\**). We have previously shown that this mutation abrogates cdGMP formation by DgcB and that production of this mutant protein does not complement a  $\Delta dgcB$  mutant for either cdGMP formation or attachment phenotypes (50). Plasmid-borne expression of wild-type *dgcB* ( $P_{lac}$ -*dgcB*) results in a massive increase in attachment and biofilm formation in either the wild-type C58 or  $\Delta pdhS2$  background (Fig. 5B). Expression of *dgcB\** from a  $P_{lac}$  promoter, however, did not increase biofilm formation in either background. In the  $\Delta pdhS2 \Delta dgcB$  mutant background expression of wild-type *dgcB* increased biofilm formation to the same degree seen in the wild-type and  $\Delta pdhS2$  mutant. Expression of the mutant *dgcB\**

allele in the  $\Delta pdhS2 \Delta dgcB$  mutant did appear to modestly increase biofilm formation, although far less than with the wild-type *dgcB* allele. Swimming motility was modestly but significantly reduced when the wild-type *dgcB* allele was provided *in trans* (Fig. S3B). Together these data are consistent both with PdhS2 negatively regulating one or more diguanylate cyclases, and for increased synthesis of cdGMP mediating the attachment and biofilm formation phenotypes of the  $\Delta pdhS2$  mutant and contributing, albeit less so, to the  $\Delta pdhS2$  motility phenotype.

**Increased attachment in a *pdhS2* mutant requires the UPP polysaccharide.** We have previously reported that PleD-stimulated attachment was due to increased levels of the unipolar polysaccharide (UPP) and cellulose (50). In addition to UPP and cellulose, *A. tumefaciens* produces at least three other exopolysaccharides: succinoglycan, cyclic  $\beta$ -1, 2 glucans,  $\beta$ -1, 3 glucan (curdlan), as well as outer membrane associated lipopolysaccharide (LPS) (51). Of these only LPS is essential for *A. tumefaciens* growth (36). The  $\Delta pdhS2$  strain was tested for the impact of each of the non-essential exopolysaccharides for biofilm formation. The *upp* mutation completely abolished attachment in both the wild type and the *pdhS2* mutant (Fig. S5). The *chvAB* mutant, known to have pleiotropic effects (52), was diminished in adherence overall, but was still elevated by the *pdhS2* mutation. None of the other exopolysaccharide pathways impacted adherence in either background. These results confirm that biofilm formation in the  $\Delta pdhS2$  strain is dependent primarily on UPP and that the motility phenotype of the  $\Delta pdhS2$  mutant is not dependent on any of the known exopolysaccharides.

**Global transcriptional analysis of PdhS2 activity.** Prior work on the DivK-CtrA pathway in other Alphaproteobacteria has shown that one mechanism by which these bacteria switch between the developmental programs of mother and daughter cells is by differential gene expression in the two cell types (27, 39, 53). The PdhS kinases may affect gene expression through two mechanisms. First, members of the PdhS kinase family have been demonstrated to affect the activity of the global transcriptional regulator, CtrA, in several Alphaproteobacteria, including *C. crescentus*, *S. meliloti*, and *B. abortus* (32, 39, 44, 54). Transcriptome effects may also result from partitioning during cytokinesis of factors regulating transcription independent of CtrA, a process that is itself indirectly regulated by the PdhS family kinases. To determine the effect of PdhS2 activity on the *A. tumefaciens* transcriptome we used whole genome microarrays. Gene expression was compared between WT and  $\Delta pdhS2$  strains grown to exponential phase in minimal media. Of 5338 unique loci represented on the arrays 39 genes were differentially regulated above our statistical cut-offs (P values,  $\leq 0.05$ ;  $\log_2$  ratios of  $\geq \pm 0.50$ ; Table 2). Of these, 24 genes were significantly upregulated, indicating negative regulation by PdhS2. Upregulated genes included *dgcB*, shown above to contribute to biofilm formation in the  $\Delta pdhS2$  mutant, and Atu3318, a LuxR-type transcriptional regulator previously identified as regulated by the VisNR regulatory system involved in motility and biofilm formation (50). Downregulated genes included six succinoglycan biosynthetic genes, consistent with previously published results showing positive regulation of succinoglycan production by PdhS2 (35).

To determine whether any of these 39 genes were putatively regulated by CtrA we scanned a sequence window from 500 bp upstream of the start codon to 100 bp into the coding sequence for plausible CtrA binding sites. CtrA binding sites were defined using the conserved Alphaproteobacterial CtrA recognition sequence 5'-TTAANNNNNGTTAAC-3' (46, 47). Sequences containing seven or more of the conserved nucleotides in this motif were deemed plausible candidates. Using these parameters 16 differentially transcribed loci have matching upstream sequences and are thus putatively regulated by CtrA, including *dgcB* and Atu3318, as well as all five of the downregulated succinoglycan biosynthetic genes (Table 2).

To verify our microarray results we measured transcription of translational fusions to  $\beta$ -galactosidase from two selected genes, *dgcB* and Atu3318, in wild-type and  $\Delta pdhS2$  backgrounds (Table 1). In both cases beta-galactosidase activity increased in the  $\Delta pdhS2$  mutant, corroborating the microarray results. Overall these results are consistent with PdhS2 impacting the motile cell developmental program through transcriptional control. The data are also consistent with PdhS2 negatively regulating DivK and thereby indirectly affecting CtrA activity during the *A. tumefaciens* cell cycle.

## DISCUSSION

**PdhS2 is a key regulator of developmental phenotypes.** Regulation of the developmental program of many Alphaproteobacteria centers on the global transcriptional regulator CtrA (42, 47, 55, 56). CtrA activity is controlled, indirectly, through a series of phosphotransfer reactions dependent on one or more PdhS-type histidine kinases. Here we show that PdhS2, one of at least four PdhS family kinases from *A. tumefaciens*, regulates developmental phenotypes at least in part through fine-tuning of the activity of CtrA. We demonstrate that null mutations of the single domain response regulator *divK* are epistatic to *pdhS2* in *A. tumefaciens* and that PdhS2 is likely to negatively regulate DivK activity. Null mutation of a second response regulator, *pleD*, is also epistatic to the *pdhS2* mutation. The phosphatase activity of PdhS2 predominates *in vivo*, although it is apparent that its kinase activity is also required for proper regulation of PdhS2 phenotypes. Determination of the timing, specificity, and regulation of both phosphatase and kinase activities await further experimentation. PdhS2 dynamically localizes to the budding pole of *A. tumefaciens* cells following cytokinesis while DivJ, another PdhS-type kinase, localizes to the non-budding pole of each cell. We propose that together the antagonistic activities of DivJ and PdhS2 (and perhaps additional PdhS homologues), coupled with their distinct localization patterns, generate a spatiotemporal gradient of phospho-DivK and phospho-PleD and an opposing gradient of phospho-CtrA, thus differentially regulating the developmental program of *A. tumefaciens* (Fig. 1A). Computational models of asymmetric cell development in *C. crescentus* support this notion, with the important caveat that

phospho-DivK and phospho-PleD may not be distributed in a gradient but rather locally restricted (23, 25, 57).

# **Plasticity and robustness of the DivK-PleD signaling module and PdhS kinases.**

The PdhS kinase homologues are all predicted to interact with two response regulators, DivK and PleD. Through modulating DivK and PleD activity, PdhS family members ultimately affect activity of CtrA. Among the Alphaproteobacteria, regulation of CtrA activity has diversified such that the number of PdhS homologues has increased and/or decreased in different species. Species have been identified that putatively contain as many as 12 distinct members, while other species have lost all PleC/DivJ homologues (39, 47). The *A. tumefaciens* genome encodes four PdhS-type proteins, all of which impact one or more developmental phenotypes. The selective forces leading to expansion or contraction of the number of PdhS family members in different species are unknown. It is evident, however, that simple functional redundancy is not a sufficient explanation as the essentiality and genetic interactions between PdhS family members and their downstream targets (DivK and PleD) varies among different Alphaproteobacteria. In *A. tumefaciens* only *divJ* is essential among the PdhS-type kinases, and neither *divK* nor *pleD* are essential, leading to the hypothesis that at least one unidentified target for DivJ exists, the activity of which is required for viability, or that dysregulation of multiple targets is synthetically lethal (35). All possible single, double, and triple mutant combinations of the remaining PdhS family members in *A. tumefaciens* are viable, as is the  $\Delta divK \Delta pleD$  mutant strain (35) (Fig. S2; and data not shown). The *divK* gene is essential in both *C. crescentus* and *S. meliloti* but essentiality

varies for the PdhS-type kinases (39, 58). Neither *pleC* nor *divJ* are essential in *C. crescentus*, whereas *pleC* is essential in *S. meliloti*. While neither *S. meliloti* *divJ* nor *cbrA* (another PdhS family member) are independently essential, cells must have at least one copy of either gene for viability (39). The varied essentiality of module components together with the known effects from loss of multiple components highlight both the genetic plasticity and signaling robustness evident in the PdhS-DivK regulatory circuit among Alphaproteobacteria.

**PdhS2 influences cdGMP-dependent phenotypes.** The effects of the *pdhS2* mutation on biofilm formation and swimming motility by PdhS2 differ from those observed for either the  $\Delta pleC$  or  $\Delta pdhS1$  mutants (35) (and data not shown). In these mutants, biofilm formation is inhibited and cell morphology is elongated and branched, similarly to the  $\Delta divK$  mutant. Reduced swimming motility in these morphologically aberrant cells is most likely due to a combination of their aberrant cell shape and flagellar placement, rather than a defect in assembly or function of the flagella (35). The motility defect in the  $\Delta pdhS2$  strain, however, appears fundamentally distinct. The increased biofilm formation and diminished motility in a *pdhS2* mutant is most similar to the inverse regulation frequently achieved by modulating internal pools of cdGMP. Indeed, our data demonstrate a strong dependence on cdGMP levels for mediating the  $\Delta pdhS2$  phenotypes. Although the overall levels of cdGMP are not significantly affected by the *pdhS2* mutation, it is clear that mutations in the diguanylate cyclases PleD, DgcA and DgcB that disable their ability to synthesize cdGMP diminish the biofilm phenotype of *pdhS2* null mutants. This suggests that increased cdGMP synthesis via these

enzymes may impart the effects on motility and biofilm formation. PdhS2 is likely to affect PleD enzymatic activity through the phosphorylation state of its receiver domain, similar to other PleD homologues (22, 59, 60). Additionally, mutation of *pdhS2* increases *dgcB* transcription providing a direct link to elevated cdGMP production. Whether PdhS2 also regulates DgcA activity remains to be determined.

**Indirect regulation of CtrA by PdhS2.** A primary candidate for ultimately mediating the effects of PdhS2 on *A. tumefaciens* physiology is the transcriptional regulator CtrA. Our data support altered CtrA activity, and not abundance, as primarily responsible for *pdhS2*- and *divK*-dependent transcriptional responses. There are several examples in *C. crescentus* where altered CtrA activity is observed without apparent significant changes in CtrA abundance (36, 61, 62). There are also several examples in both *C. crescentus* and *S. meliloti* where altered PdhS kinase activity results in both perturbed activity and altered abundance of CtrA (39, 63). Our expression analyses suggest that *A. tumefaciens* CtrA functions to both activate some promoters (e.g. succinoglycan synthetic genes and *ctrA*) while repressing others (e.g. *dgcB*, *Atu3318*, and *pdhS1*).

**Convergence of PdhS2 and VisNR regulatory pathways.** Many phenotypes regulated by PdhS2 mirror those regulated by the LuxR-type transcriptional motility regulators VisR and VisN (50). Loss of either *visN* or *visR* results in strong inhibition of motility and a dramatic increase in attachment and biofilm formation, that is dependent on cdGMP production. Moreover, VisNR effects on attachment require the diguanylate cyclases DgcA and DgcB. Both PdhS2 and VisNR positively regulate succinoglycan



production at the transcriptional level, and negatively regulate transcription of the LuxR-type regulator Atu3318. The promoter region for Atu3318 as well as several of the succinoglycan genes contain a consensus CtrA binding site, and PdhS2 control is most likely mediated through CtrA. It is possible that the increased activity of one or more diguanylate cyclases in the  $\Delta visR/\Delta visN$  mutants ultimately results in decreased abundance or activity of CtrA. In both *C. crescentus* and *A. tumefaciens*, cdGMP allosterically switches the bifunctional hybrid histidine kinase CckA from kinase to phosphatase mode, downregulating CtrA phosphorylation and DNA-binding activity (30, 31). In contrast, VisNR motility control is mediated directly through transcriptional control of the Rem activator of flagellar gene expression (50, 64). Our *pdhS2* expression profiling does not reveal a decrease in flagellar gene transcription, suggesting distinct mechanisms. Furthermore, the increase in UPP and cellulose production in *visR* and *visN* mutants is cdGMP-dependent, and likely proceeds via allosteric control of the UPP biosynthesis machinery and cellulose synthase (which has a PilZ-type cdGMP binding motif). It is quite plausible that a significant fraction of the *pdhS2* hyper-adherent phenotype reflects similar allosteric control of UPP and cellulose.

### **Segregation of antagonistic signaling activity promotes asymmetric development.**

The asymmetric division of *A. tumefaciens* and other Alphaproteobacteria, producing two genetically identical but phenotypically distinct daughter cells, requires well-coordinated regulation of two developmental programs. The mother cell remains in a terminally differentiated state, proceeding through distinct synthesis (S) and growth (G2) phases of the cell cycle (51, 55). During G2 phase the cell elongates into a predivisional

cell and establishes a functional asymmetry between its two cellular poles by differential localization of antagonistic homologues of the PdhS kinases. At least one PdhS kinase, DivJ in *C. crescentus* and *A. tumefaciens*, PdhS in *B. abortus* and CbrA in *S. meliloti*, localizes to the attached pole (18, 38) (Fig. 1A and 3B). At this site these kinases can act to phosphorylate DivK and PleD, indirectly inactivating CtrA (as reported for *Caulobacter*). At the opposite pole at least one PdhS kinase, PleC in *C. crescentus* and PdhS2 in *A. tumefaciens* (Fig. 1A and 3A), localizes and acts primarily to dephosphorylate DivK and PleD, ultimately promoting CtrA stability and activity. Upon cytokinesis, then, the motile daughter cell is released in a G1 growth phase with high levels of CtrA activity establishing a distinct transcriptional program.

Pole specification may also be generated as a natural consequence of cell division. Following each cytokinetic event a new, younger pole is generated from the division septum. Cell elongation in many Rhizobiales, including *A. tumefaciens*, occurs in the absence of obvious homologues to DivIVA or MreB, important regulators of cell elongation in many rod-shaped bacteria (65). Instead, cell elongation in these bacteria occurs primarily at the younger pole of the bacterium in a process of zonal insertion of peptidoglycan and cell membrane components (6, 7). The canonical cell division proteins FtsZ and FtsA both localize at the growing pole of *A. tumefaciens* until just prior to cytokinesis at which point they relocalize to the cell division septum. Several other *A. tumefaciens* proteins, including PopZ and PodJ, act as dynamic fiduciary markers localizing to one or both bacterial poles throughout the cell cycle (66, 67). While these cell cycle, elongation, and division components make use of polar localization the role played by any of these proteins in differentiation of old versus new poles is unclear.

Our data are consistent with PdhS2 acting in the motile daughter cell to prevent premature activation of cell attachment processes such as UPP production, as well as to inhibit motility. Our results suggest that  $\Delta pdhS2$  mutant cells are blocked from completely exiting the dividing cell phase and differentiating into the motile cell type. Alternatively,  $\Delta pdhS2$  mutant cells may have an abridged motile cell (G1) phase and prematurely differentiate into the dividing cell type. In either case, *pdhS2* mutants assemble polar flagella in daughter cells, but these seem to be largely blocked for rotation, hence the swimming deficiency in the *pdhS2* mutant.

The subtle effects on CtrA abundance coupled with the modest, but significant, effects on several CtrA-dependent promoters, suggest that either PdhS2 regulation of CtrA activity is restricted to a very tight window during the cell cycle or to a specific location within the developing cell. Alternatively, the complement of remaining PdhS kinases buffer CtrA activity in the absence of *pdhS2*. Microarray results using unsynchronized cultures of *S. meliloti* lacking either the *divJ* or the *cbrA* PdhS kinase were similar to those in our own study (39, 68). All three datasets uncovered a restricted set of differentially regulated genes, several of which were common to one or more experiment (Table 2). Transcriptional assays of the *dgcB* and *Atu3318* promoters are consistent with the microarray data in both directionality and magnitude. It is telling that reporter activity of these potential CtrA-regulated promoters in the  $\Delta pdhS2$  mutant is two to three times higher than the remaining regulated promoters (Table 1). This lower overall activity may explain why more putative CtrA-dependent promoters were not identified in the transcriptional profiling. A reassessment for transcriptional effects of the

PdhS kinases will be a high priority once synchronization and cell type enrichment procedures are developed.

All of the PdhS-type kinases in *A. tumefaciens* including PleC and DivJ are hypothesized to function through the DivK and PleD response regulators. However, it is clear that they can have starkly distinct regulatory outputs. In *A. tumefaciens* *pleC* and *pdhS1* mutants manifest defects in budding and form branched cells, whereas the *pdhS2* mutant has no apparent defect in budding, and is instead down for motility and elevated for attachment. These differences may in large measure reflect the spatial and temporal control of their activity. We hypothesize that spatial restriction of PdhS2 activity to the budding poles of mother cells, that rapidly transition to become the old pole of newly formed daughter cells, imparts PdhS2 control of motility and attachment processes, without strongly influencing the budding process *per se*.

## MATERIALS AND METHODS

**Strains and plasmids.** Bacterial strains, plasmids, and oligonucleotides used in these studies are listed in Tables S1 through S3. *A. tumefaciens* was routinely cultivated at 28°C in AT minimal medium plus 1% (w/v) glucose as a carbon source and 15 mM (NH<sub>4</sub>)<sub>2</sub>SO<sub>4</sub> as a nitrogen source (ATGN), without exogenous FeSO<sub>4</sub> (69, 70). For biofilm assays 22 µM FeSO<sub>4</sub> was included in the media. *E. coli* was routinely cultivated at 37°C in lysogeny broth (LB). Antibiotics were used at the following concentrations (*A. tumefaciens*/*E. coli*): ampicillin (100/100 µg·mL<sup>-1</sup>), kanamycin (150/25 µg·mL<sup>-1</sup>), gentamicin (150/30 µg·mL<sup>-1</sup>), spectinomycin (300/100 µg·mL<sup>-1</sup>), and tetracycline (4/10 µg·mL<sup>-1</sup>).

Non-polar, markerless deletion of *pdhS2* (Atu1888) in all genetic backgrounds used in this work was accomplished using splicing by overlap extension (SOE) polymerase chain reaction (PCR) followed by homologous recombination, as described (35). Suicide plasmid pJEH040 carries an approximately 1 kb SOE deletion fragment of *pdhS2* on a pNPTS138 vector backbone. pNPTS138 is a ColE1 plasmid and as such is unable to replicate in *A. tumefaciens*. pJEH040 was delivered to recipient strains by either transformation or conjugation followed by selection on ATGN plates supplemented with 300 µg·mL<sup>-1</sup> Km, selecting for *A. tumefaciens* cells in which pJEH040 had integrated at the chromosomal *pdhS2* locus by homologous recombination. Recombinants were then grown overnight at 28°C in ATGN in the absence of Km and plated the following day onto ATSN (ATGN with sucrose substituted for glucose) agar plates to select for sucrose resistant (Suc<sup>R</sup>) allelic replacement

candidates. After three days' growth at 28°C colonies were patched in parallel onto ATGN Km and ATSN plates. Km<sup>S</sup> Suc<sup>R</sup> recombinants were then tested for the targeted deletion by diagnostic PCR using primers external to the *pdhS2* locus (JEH100 and JEH113) as well as internal primers (JEH85 and JEH87). Candidate colonies were further streak purified and verified a second time by diagnostic PCR before being used in downstream assays.

Site-directed mutagenesis of *pdhS2* was achieved using mutagenic primer pairs JEH245/JEH246 (for generating the His271Ala allele, H271A) or JEH261/JEH262 (for generating the Thr275Ala allele, T275A). Plasmid pJEH021 carrying the wild-type *pdhS2* sequence was amplified by PCR using the above primer pairs. Following amplification, reaction mixtures were treated with *DpnI* restriction endonuclease to remove template plasmid and then transformed into TOP10 F' *E. coli* competent cells. Purified plasmids from each transformation were sequenced and those containing the desired mutations, pJEH091 for His271Ala and pJEH099 for Thr275Ala, were selected for sub-cloning. pJEH091 and pJEH099 were digested with *NdeI* and *NheI* followed by gel electrophoresis and purification of the resulting insert. Inserts were ligated into similarly digested pSRKGm and transformed into competent *E. coli* TOP10 F' cells. Purified plasmids from each transformation were sequenced to verify their identity. The resulting plasmids, pJEH092 (H271A) and pJEH102 (T275A), were used to transform *A. tumefaciens*. To generate a PdhS2 allele carrying both H271A and T275A mutations the same steps were followed as above using plasmid pJEH091 as template with mutagenic primers JEH261/JEH262.

Translational fusions of full-length wild-type PdhS2 and DivJ to GFP were constructed as follows. *pdhS2* and *divJ*, each lacking a stop codon were amplified by PCR using primer pairs JEH65/JEH146 (*pdhS2*) and JEH147/JEH148 (*divJ*) with *A. tumefaciens* strain C58 genomic DNA as template. Primer design for these amplifications included 5' *NdeI* and 3' *NheI* restriction sites. The *gfpmut3* gene including a 5' *NheI* site and a 3' *KpnI* site was amplified using primer pair JEH149/JEH150 and pJZ383 as template. Amplicons were gel purified, ligated into pGEM-T Easy, transformed into competent TOP10 F' *E. coli*, and eventually sequenced. The resulting plasmids, pJEH052 (*pdhS2*), pJEH053 (*gfpmut3*), and pJEH054 (*divJ*) were digested with either *NdeI* and *NheI* (pJEH052 and pJEH054) or *NheI* and *KpnI* (pJEH053). Inserts were gel purified and used in a three-component ligation with *NdeI/KpnI*-digested pSRKGm generating pJEH060 (PdhS2-GFP) and pJEH078 (DivJ-GFP). Sequenced plasmids were used to transform *A. tumefaciens*. Translational fusions of full-length mutant PdhS2 alleles (H271A or T275A) to tdTomato (Table S2) were generated using primers JEH65 and JEH272 with either pJEH091 or pJEH099 as template. The resulting amplicons were gel purified and ligated into pGEM-T Easy to generate plasmids pJEH125 and pJEH126. pJEH125 and pJEH126 were digested with *NdeI* and *SacI* and the resulting inserts gel purified and ligated with similarly treated pSRKKm-tdTomato, generating plasmids pJEH127 and pJEH128.

Reporter gene fusion constructs included predicted promoter regions from between 200 bp and 400 bp upstream of the indicated gene through the start codon. Each upstream region was amplified by PCR using the primers listed in Table S3 using *A. tumefaciens* genomic DNA as template. Amplicons were gel purified, ligated into

pGEM-T Easy, transformed into competent TOP10 F' *E. coli*, and eventually sequenced. The resulting plasmids, pJEH113 (*ccrM*, Atu0794, promoter), pJEH115 (*ctrA*, Atu2434, promoter), and pJEH119 (*pdhS1*, Atu0614, promoter) were digested with either *KpnI* and *HinDIII* (pJEH113 and pJEH119) or *KpnI* and *PstI* (pJEH115). Inserts were gel purified and ligated with similarly treated pRA301 containing a promoterless *E. coli lacZ* gene without its own ribosome binding site. The resulting constructs (pJEH121, pJEH122, and pJEH124) carry *lacZ* translationally fused to the start codon for each gene with transcription and translation driven by the fused upstream region. pJEH121, pJEH122, and pJEH124 were used to transform *A. tumefaciens* for subsequent beta-galactosidase assays.

**Static biofilm assays.** Overnight cultures in ATGN were sub-cultured in fresh ATGN to an optical density at 600 nm (OD<sub>600</sub>) of 0.1 and grown with aeration at 28°C until an OD<sub>600</sub> of 0.25-0.6. Cultures were diluted to OD<sub>600</sub> of 0.05 and 3 mL were inoculated into each of four wells in a 12-well plate. A single coverslip was placed vertically into each well to submerge approximately half of each coverslip. Plates were incubated in a humidified chamber at 28° for 48 h. Coverslips were removed from each well, rinsed with water, and adherent biomass stained by 5 min immersion in a 0.1% (w/v) crystal violet solution. Adsorbed crystal violet was solubilized by immersion in 1 mL 33% acetic acid and the absorbance of this solution determined at 600 nm (A<sub>600</sub>) on a Synergy HT multi-detection microplate reader (Bio-Tek). Culture density for each sample was also determined by measuring the OD<sub>600</sub> of each culture. Data are typically presented as A<sub>600</sub>/OD<sub>600</sub> ratios normalized to values obtained for the wild-type strain within each



experiment. ATGN was supplemented with antibiotics and IPTG as appropriate. Final inoculations also included supplemental iron (22  $\mu$ M). Each mutant was evaluated in three independent experiments each of which contained three technical replicates.

**Motility assays.** Wet mounts of exponentially growing cultures were observed under brightfield optics using a Zeiss Axioskop 40 equipped with an AxioCam MRm monochrome digital camera. Swim plates containing 0.3% agarose in ATGN, supplemented with 1 mM IPTG and antibiotics when appropriate, were inoculated with a single colony of the indicated strain at a central point and incubated for 7 days at 28°C. Swim ring diameters were measured daily for seven days. Each experimental condition was tested in three independent experiments containing three technical replicates.

**Microscopy.** Cell morphology and localization of PdhS2-GFP and DivJ-GFP was evaluated using a Nikon E800 fluorescence microscope equipped with a Photometrics Cascade cooled CCD camera. Overnight cultures were grown in ATGN with gentamicin and 250  $\mu$ M IPTG. The following day each strain was sub-cultured to OD<sub>600</sub> 0.1 and then grown at 28°C with aeration until ~OD<sub>600</sub> 0.5-0.8. The culture (0.5  $\mu$ l) was transferred to a 1% ATGN/agarose pad on a clean glass slide and a clean 22 x 22 mm number 1.5 glass coverslip placed on top. Images were acquired using a 100X oil immersion objective and phase contrast optics or epifluorescence with a FITC-HYQ filter set (Nikon; excitation filter = 480/40 nm, dichromatic mirror = 505 nm, absorption filter = 535/50 nm). Time-lapse microscopy utilized a Nikon Ti-E inverted fluorescence microscope with a Plan Apo 60X/1.40 oil Ph3 DM objective, a DAPI/FITC/Cy3/Cy5 filter

cube, an Andor iXon3 885 EMCCD camera, and a Lumencor Spectra X solid state light engine at 20% power. For time-lapse imaging agarose pads included 250  $\mu$ M IPTG and coverslips were attached to the glass slide using a gas-permeable 1:1:1 mixture of Vaseline, lanolin, and paraffin. Phase and fluorescence images were captured every 20 min for 8 h using a 60 ms (phase) or 2 s (fluorescence) exposure. Images were analyzed using ImageJ (Schneider *et al.*, 2012, Schindelin *et al.*, 2012, Schindelin *et al.*, 2015). Localization of all PdhS2-tdTomato constructs was evaluated using a Zeiss AxioObserver.Z1 fluorescence microscope equipped with a Photometrics Cascade cooled CCD camera. Cultures were treated as above and images acquired using a 100x oil immersion objective and Semrock TXRED-4040b-zhe-zero filter cube.

**Transcriptional profiling.** Whole-genome transcriptional profiling using custom 60-mer oligonucleotide microarrays was performed essentially as previously described (71). Arrays were produced by Agilent Technologies, and consist of 8455 features that represent 5338 predicted protein-encoding open reading frames, tRNA and rRNA encoding genes, and 2,983 duplicate spots. Cultures of wild-type or the  $\Delta pdhS2$  mutant strain of *A. tumefaciens* strain C58 were grown overnight in ATGN to full turbidity and then sub-cultured 1:150 into fresh ATGN for a second overnight growth. The following morning a volume equivalent to 11 ml of OD<sub>600</sub> 0.6 was prepared for RNA extraction using RNeasy Protect Bacteria Reagent (QIAGEN, Germantown, MD) following the manufacturer's protocol. RNA was extracted from these samples using QIAGEN RNA midipreps (QIAGEN, Germantown, MD) following the manufacturer's protocol. DNA contamination was removed by DNase digestion using the TURBO DNA-free kit

(Ambion, Austin, TX) with the incubation time extended to two hours. First strand cDNA synthesis was performed using Invitrogen SuperScript Indirect Labeling Kit, and cDNA was purified on Qiagen QIAQuick columns. cDNA was labeled with AlexaFluor 555 and 647 dyes using Invitrogen SuperScript cDNA Labeling Kit, and repurified on QIAQuick columns. cDNA was quantified on a NanoDrop spectrophotometer. Hybridization reactions were performed using Agilent in situ Hybridization Kit Plus, boiled for 5 min at 95°C, applied to the printed arrays, and hybridized overnight at 65°C. Hybridized arrays were washed with Agilent Wash Solutions 1 and 2, rinsed with acetonitrile, and incubated in Agilent Stabilization and Drying Solution immediately prior to scanning the arrays. Three independent biological replicates were performed, with one dye swap. Hybridized arrays were scanned on a GenePix Scanner 4200 in the Center for Genomics and Bioinformatics (CGB) at Indiana University. GenePix software was used to define the borders of hybridized spots, subtract background, measure dye intensity at each spot, and calculate the ratio of dye intensities for each spot. Analysis of the scanned images was conducted using the LIMMA package in R/Bioconductor. Background correction of the data was performed using the minimum method (72, 73). The data was normalized within arrays with the LOESS method, and between arrays with the quantile method. Statistical analysis was performed using linear model fitting and empirical Bayesian analysis by least squares. Genes with significant *P* values ( $\leq 0.05$ ) and with  $\log_2$  ratios of  $\geq 0.50$  or  $\leq -0.50$  (representing a fold-change of  $\pm 1.4$ ) are reported here. Expression data have been deposited in the Gene Expression Omnibus (GEO) database at the National Center for Biotechnology Information (NCBI) under accession number [GSE71267](https://www.ncbi.nlm.nih.gov/geo/query/acc.cgi?acc=GSE71267) (74).

$\beta$ -galactosidase activity was measured using a modified protocol of Miller (75). Cultures carrying transcriptional reporter plasmids were grown overnight in ATGN and sub-cultured the following morning to OD<sub>600</sub> 0.15. Diluted cultures were grown at 28°C with aeration until reaching mid-exponential growth. Between 100 and 300  $\mu$ L of exponential phase culture was mixed with Z buffer (60 mM Na<sub>2</sub>HPO<sub>4</sub>, 40 mM NaH<sub>2</sub>PO<sub>4</sub>, 10 mM KCl, 1 mM MgSO<sub>4</sub>, pH = 7.0) to a final volume of 1 mL (volume of culture = f) plus two drops 0.05% sodium dodecyl sulfate and 3 drops CHCl<sub>3</sub>. The amount of culture volume used was calibrated to generate reaction times between 15 minutes and two hours for cultures with activity. 0.1 mL of a 4 mg·mL<sup>-1</sup> solution in Z buffer of the colorimetric substrate 2-nitrophenyl  $\beta$ -D-galactopyranoside (ONPG) was added and the time (t) required for the solution to turn yellow was recorded. The reaction was stopped by addition of 1 M Na<sub>2</sub>CO<sub>3</sub> and the absorbance at 420 nm (A<sub>420</sub>) of each solution was measured. Promoter activity is expressed in Miller units (MUs = [1000 x A<sub>420nm</sub>]/[OD<sub>600nm</sub> x t x f]). Each mutant was tested in three independent experiments containing five technical replicates.

**Protein stability assays.** Steady-state levels of CtrA were determined from stationary phase cultures of wild-type,  $\Delta divK$ , and  $\Delta pdhS2$  strains of *A. tumefaciens*. Overnight cultures of each strain were grown in TY broth at 28°C with aeration to an OD<sub>600</sub> > 1. Two 1 mL aliquots were removed from each culture, pelleted by centrifugation (13,200 x g, 2 min) and supernatants discarded. One of the resulting pellets was resuspended on ice in 50  $\mu$ L 100 mM Tris·HCl, pH 6.8, followed by 50  $\mu$ L 2X SDS-PAGE loading buffer (65.8 mM Tris·HCl, pH 6.8, 26.3% (v/v) glycerol, 2.1% (w/v) sodium dodecyl sulfate

(SDS), 0.01% (w/v) bromophenol blue), then stored frozen at -20°C. The second pellet was resuspended in 100 µL 1X protein assay buffer (32.9 mM Tris·HCl, pH 6.8, 1% SDS), boiled 10 minutes, and used for protein concentration determination using the Pierce BCA Protein Assay Kit (Thermo Fisher Scientific), per manufacturer's instructions. Frozen resuspended pellets were thawed on ice and β-mercaptoethanol added to a final concentration of 5% prior to electrophoresis. Samples were normalized for protein concentration and separated on a 12.5% SDS-polyacrylamide gel. Following electrophoresis proteins were transferred to Immobilon-FL polyvinyl difluoride membranes (EMD Millipore). Membranes were rinsed in 1X Tris-buffered saline (TBS; 50 mM Tris·HCl, pH 7.5, 150 mM NaCl) solution and air dried. Membranes were wetted with MeOH and incubated in blocking buffer (1X TBS, 5% non-fat dairy milk [NFDm]) for 1 h at room temperature and then incubated overnight at 4°C with primary antibody (1:5000 dilution of rabbit anti-CtrA from *C. crescentus*, anti-CtrA<sub>CC</sub>, in 1X TBS/5% NFDm/0.2% Tween 20). The following day membranes were rinsed thoroughly with 1X TBS/0.1% Tween 20 and incubated 1 h at room temperature with secondary antibody (1:20,000 dilution of IRDye 800CW-conjugated goat anti-rabbit antibody (LI-COR) in 1X TBS/5% NFDm/0.2% Tween 20/0.01% SDS). Membranes were rinsed thoroughly with 1X TBS/0.1% Tween 20 followed by 1X TBS alone and air dried in the dark. The resulting blot was imaged using a LI-COR Odyssey Classic infrared imaging system. Band intensities were quantified using the Odyssey Classic software.

Proteolytic turnover of CtrA was evaluated using translational shut-off assays. Overnight cultures were grown in TY broth at 28°C with aeration. The following day each strain was sub-cultured in fresh TY broth to an OD<sub>600</sub> 0.05 and incubated at 28°C

with aeration. To inhibit protein synthesis  $90 \mu\text{g}\cdot\text{mL}^{-1}$  chloramphenicol was added to each culture at  $\text{OD}_{600}$  0.5. Starting at the time of chloramphenicol addition 5 mL aliquots were removed every 30 min for 3 h. Each aliquot was pelleted by centrifugation ( $5000 \times g$ , 10 min). Cleared supernatants were discarded and pellets resuspended to an  $\text{OD}_{600}$  10.0 in Tris-Cl, (10 mM, pH 8.0). Resuspended pellets were mixed with 2X SDS-PAGE loading buffer and stored frozen at  $-20^{\circ}\text{C}$ . Levels of CtrA were determined by SDS-PAGE and Western blotting as described above. Band intensities were quantified using the Odyssey Classic software and normalized to the band intensity of CtrA from the wild-type background at  $t = 0$  min.

**Global cdGMP measurement.** Measurement of cdGMP levels was performed by liquid chromatography, tandem mass spectrometry (LC-MS/MS) on a Quattro Premier XE mass spectrometer coupled with an Acquity Ultra Performance LC system (Waters Corporation), essentially as previously described (76). Concentrations of cdGMP in cell samples were compared to chemically synthesized cdGMP (Axxora) dissolved in water at concentrations of 250, 125, 62.5, 31.2, 15.6, 7.8, 3.9, and 1.9 nM to generate a calibration curve. *A. tumefaciens* derivatives were grown in ATGN overnight at  $28^{\circ}\text{C}$  to stationary phase. Culture densities were normalized after collecting cells by centrifugation and then resuspension in the appropriate volume of ATGN. Cultures were then pelleted by centrifugation and resuspended in ice-cold 250  $\mu\text{L}$  extraction buffer (methanol:acetonitrile:water, 40:40:20 + 0.1 N formic acid) and incubated for 30 min at  $-20^{\circ}\text{C}$ . Resuspensions were transferred to microcentrifuge tubes and pelleted ( $13,000 \times \text{rpm}$ , 5 min). 200  $\mu\text{L}$  of the resulting supernatant was neutralized with 8  $\mu\text{L}$  15%

826     $\text{NH}_4\text{HCO}_3$ . Neutralized samples were stored at  $-20^\circ\text{C}$  prior to mass spectrometry  
827    analysis.  
828

829

## ACKNOWLEDGEMENTS

830

This project was supported by National Institutes of Health (NIH) grants GM080546

831

(C.F.) and GM109259 (C.M.W.). J.E.H. was supported by a Ruth L. Kirschstein National

832

Research Service Award (1 F32 GM100601) from the NIH.

833



834

## REFERENCES

- 835 1. **Kysela DT, Randich AM, Caccamo PD, Brun YV.** 2016. Diversity takes shape: understanding the  
836 mechanistic and adaptive basis of bacterial morphology. *PLoS Biol* **14**:e1002565.
- 837 2. **Dworkin M.** 1985. Developmental biology of the bacteria. Benjamin/Cummings Pub. Co.,  
838 Reading, Mass.
- 839 3. **Hajduk IV, Rodrigues CD, Harry EJ.** 2016. Connecting the dots of the bacterial cell cycle:  
840 Coordinating chromosome replication and segregation with cell division. *Semin Cell Dev Biol*  
841 **53**:2-9.
- 842 4. **Costerton JW, Lewandowski Z, Caldwell DE, Korber DR, Lappin-Scott HM.** 1995. Microbial  
843 biofilms. *Annu Rev Microbiol* **49**:711-45.
- 844 5. **Jonas K.** 2014. To divide or not to divide: control of the bacterial cell cycle by environmental  
845 cues. *Curr Opin Microbiol* **18**:54-60.
- 846 6. **Brown PJ, de Pedro MA, Kysela DT, Van der Henst C, Kim J, De Bolle X, Fuqua C, Brun YV.** 2012.  
847 Polar growth in the Alphaproteobacterial order Rhizobiales. *Proc Natl Acad Sci U S A* **109**:1697-  
848 701.
- 849 7. **Zupan JR, Cameron TA, Anderson-Furgeson J, Zambryski PC.** 2013. Dynamic FtsA and FtsZ  
850 localization and outer membrane alterations during polar growth and cell division in  
851 *Agrobacterium tumefaciens*. *Proc Natl Acad Sci U S A* **110**:9060-5.
- 852 8. **Reuter SH, Shapiro L.** 1987. Asymmetric segregation of heat-shock proteins upon cell division in  
853 *Caulobacter crescentus*. *J Mol Biol* **194**:653-62.
- 854 9. **Lindner AB, Madden R, Demarez A, Stewart EJ, Taddei F.** 2008. Asymmetric segregation of  
855 protein aggregates is associated with cellular aging and rejuvenation. *Proc Natl Acad Sci U S A*  
856 **105**:3076-81.
- 857 10. **Kysela DT, Brown PJ, Huang KC, Brun YV.** 2013. Biological consequences and advantages of  
858 asymmetric bacterial growth. *Annu Rev Microbiol* **67**:417-35.
- 859 11. **Berne C, Ma X, Licata NA, Neves BR, Setayeshgar S, Brun YV, Dragnea B.** 2013. Physiochemical  
860 properties of *Caulobacter crescentus* holdfast: a localized bacterial adhesive. *J Phys Chem B*  
861 **117**:10492-503.
- 862 12. **Curtis PD, Brun YV.** 2010. Getting in the loop: regulation of development in *Caulobacter*  
863 *crescentus*. *Microbiol Mol Biol Rev* **74**:13-41.
- 864 13. **Quon KC, Marczyński GT, Shapiro L.** 1996. Cell cycle control by an essential bacterial two-  
865 component signal transduction protein. *Cell* **84**:83-93.
- 866 14. **Domian IJ, Reisenauer A, Shapiro L.** 1999. Feedback control of a master bacterial cell-cycle  
867 regulator. *Proc Natl Acad Sci U S A* **96**:6648-53.
- 868 15. **Lasker K, Mann TH, Shapiro L.** 2016. An intracellular compass spatially coordinates cell cycle  
869 modules in *Caulobacter crescentus*. *Curr Opin Microbiol* **33**:131-139.
- 870 16. **Jenal U, Fuchs T.** 1998. An essential protease involved in bacterial cell-cycle control. *EMBO J*  
871 **17**:5658-69.
- 872 17. **Siam R, Marczyński GT.** 2000. Cell cycle regulator phosphorylation stimulates two distinct  
873 modes of binding at a chromosome replication origin. *EMBO J* **19**:1138-47.
- 874 18. **Wheeler RT, Shapiro L.** 1999. Differential localization of two histidine kinases controlling  
875 bacterial cell differentiation. *Mol Cell* **4**:683-94.
- 876 19. **Viollier PH, Sternheim N, Shapiro L.** 2002. Identification of a localization factor for the polar  
877 positioning of bacterial structural and regulatory proteins. *Proc Natl Acad Sci U S A* **99**:13831-6.

- 878 20. **Hinz AJ, Larson DE, Smith CS, Brun YV.** 2003. The *Caulobacter crescentus* polar organelle  
879 development protein PodJ is differentially localized and is required for polar targeting of the  
880 PleC development regulator. *Mol Microbiol* **47**:929-41.
- 881 21. **Radhakrishnan SK, Thanbichler M, Viollier PH.** 2008. The dynamic interplay between a cell fate  
882 determinant and a lysozyme homolog drives the asymmetric division cycle of *Caulobacter*  
883 *crescentus*. *Genes Dev* **22**:212-25.
- 884 22. **Paul R, Jaeger T, Abel S, Wiederkehr I, Folcher M, Biondi EG, Laub MT, Jenal U.** 2008. Allosteric  
885 regulation of histidine kinases by their cognate response regulator determines cell fate. *Cell*  
886 **133**:452-61.
- 887 23. **Tropini C, Huang KC.** 2012. Interplay between the localization and kinetics of phosphorylation in  
888 flagellar pole development of the bacterium *Caulobacter crescentus*. *PLoS Comput Biol*  
889 **8**:e1002602.
- 890 24. **Subramanian K, Paul MR, Tyson JJ.** 2013. Potential role of a bistable histidine kinase switch in  
891 the asymmetric division cycle of *Caulobacter crescentus*. *PLoS Comput Biol* **9**:e1003221.
- 892 25. **Subramanian K, Paul MR, Tyson JJ.** 2015. Dynamical localization of DivL and PleC in the  
893 asymmetric division cycle of *Caulobacter crescentus*: A theoretical investigation of alternative  
894 models. *PLoS Comput Biol* **11**:e1004348.
- 895 26. **Quon KC, Yang B, Domian IJ, Shapiro L, Marczynski GT.** 1998. Negative control of bacterial DNA  
896 replication by a cell cycle regulatory protein that binds at the chromosome origin. *Proc Natl*  
897 *Acad Sci U S A* **95**:120-5.
- 898 27. **Laub MT, Chen SL, Shapiro L, McAdams HH.** 2002. Genes directly controlled by CtrA, a master  
899 regulator of the *Caulobacter* cell cycle. *Proc Natl Acad Sci U S A* **99**:4632-7.
- 900 28. **Laub MT, McAdams HH, Feldblyum T, Fraser CM, Shapiro L.** 2000. Global analysis of the genetic  
901 network controlling a bacterial cell cycle. *Science* **290**:2144-8.
- 902 29. **Chen YE, Tsokos CG, Biondi EG, Perchuk BS, Laub MT.** 2009. Dynamics of two phosphorelays  
903 controlling cell cycle progression in *Caulobacter crescentus*. *J Bacteriol* **191**:7417-29.
- 904 30. **Dubey BN, Lori C, Ozaki S, Fucile G, Plaza-Menacho I, Jenal U, Schirmer T.** 2016. Cyclic di-GMP  
905 mediates a histidine kinase/phosphatase switch by noncovalent domain cross-linking. *Sci Adv*  
906 **2**:e1600823.
- 907 31. **Lori C, Ozaki S, Steiner S, Bohm R, Abel S, Dubey BN, Schirmer T, Hiller S, Jenal U.** 2015. Cyclic  
908 di-GMP acts as a cell cycle oscillator to drive chromosome replication. *Nature* **523**:236-9.
- 909 32. **Tsokos CG, Perchuk BS, Laub MT.** 2011. A dynamic complex of signaling proteins uses polar  
910 localization to regulate cell-fate asymmetry in *Caulobacter crescentus*. *Dev Cell* **20**:329-41.
- 911 33. **Childers WS, Xu Q, Mann TH, Mathews, II, Blair JA, Deacon AM, Shapiro L.** 2014. Cell fate  
912 regulation governed by a repurposed bacterial histidine kinase. *PLoS Biol* **12**:e1001979.
- 913 34. **Chen YE, Tropini C, Jonas K, Tsokos CG, Huang KC, Laub MT.** 2011. Spatial gradient of protein  
914 phosphorylation underlies replicative asymmetry in a bacterium. *Proc Natl Acad Sci U S A*  
915 **108**:1052-7.
- 916 35. **Kim J, Heindl JE, Fuqua C.** 2013. Coordination of division and development influences complex  
917 multicellular behavior in *Agrobacterium tumefaciens*. *PLoS One* **8**:e56682.
- 918 36. **Curtis PD, Brun YV.** 2014. Identification of essential alphaproteobacterial genes reveals  
919 operational variability in conserved developmental and cell cycle systems. *Mol Microbiol*  
920 **93**:713-35.
- 921 37. **Romling U, Galperin MY, Gomelsky M.** 2013. Cyclic di-GMP: the first 25 years of a universal  
922 bacterial second messenger. *Microbiol Mol Biol Rev* **77**:1-52.
- 923 38. **Hallez R, Bellefontaine AF, Letesson JJ, De Bolle X.** 2004. Morphological and functional  
924 asymmetry in alpha-proteobacteria. *Trends Microbiol* **12**:361-5.

39. **Pini F, Frage B, Ferri L, De Nisco NJ, Mohapatra SS, Taddei L, Fioravanti A, Dewitte F, Galardini M, Brilli M, Villeret V, Bazzicalupo M, Mengoni A, Walker GC, Becker A, Biondi EG.** 2013. The DivJ, CbrA and PleC system controls DivK phosphorylation and symbiosis in *Sinorhizobium meliloti*. *Mol Microbiol* **90**:54-71.
40. **Gao R, Stock AM.** 2009. Biological insights from structures of two-component proteins. *Annu Rev Microbiol* **63**:133-54.
41. **Huynh TN, Stewart V.** 2011. Negative control in two-component signal transduction by transmitter phosphatase activity. *Mol Microbiol* **82**:275-86.
42. **Tsokos CG, Laub MT.** 2012. Polarity and cell fate asymmetry in *Caulobacter crescentus*. *Curr Opin Microbiol* **15**:744-50.
43. **Laloux G, Jacobs-Wagner C.** 2014. How do bacteria localize proteins to the cell pole? *J Cell Sci* **127**:11-9.
44. **Hallez R, Mignolet J, Van Mullem V, Wery M, Vandenhoute J, Letesson JJ, Jacobs-Wagner C, De Bolle X.** 2007. The asymmetric distribution of the essential histidine kinase PdhS indicates a differentiation event in *Brucella abortus*. *EMBO J* **26**:1444-55.
45. **Lam H, Matroule JY, Jacobs-Wagner C.** 2003. The asymmetric spatial distribution of bacterial signal transduction proteins coordinates cell cycle events. *Dev Cell* **5**:149-59.
46. **Kahng LS, Shapiro L.** 2001. The CcrM DNA methyltransferase of *Agrobacterium tumefaciens* is essential, and its activity is cell cycle regulated. *J Bacteriol* **183**:3065-75.
47. **Brilli M, Fondi M, Fani R, Mengoni A, Ferri L, Bazzicalupo M, Biondi EG.** 2010. The diversity and evolution of cell cycle regulation in alpha-proteobacteria: a comparative genomic analysis. *BMC Syst Biol* **4**:52.
48. **Skerker JM, Shapiro L.** 2000. Identification and cell cycle control of a novel pilus system in *Caulobacter crescentus*. *EMBO J* **19**:3223-34.
49. **Stephens CM, Zweiger G, Shapiro L.** 1995. Coordinate cell cycle control of a Caulobacter DNA methyltransferase and the flagellar genetic hierarchy. *J Bacteriol* **177**:1662-9.
50. **Xu J, Kim J, Koestler BJ, Choi JH, Waters CM, Fuqua C.** 2013. Genetic analysis of *Agrobacterium tumefaciens* unipolar polysaccharide production reveals complex integrated control of the motile-to-sessile switch. *Mol Microbiol* **89**:929-48.
51. **Heindl JE, Wang Y, Heckel BC, Mohari B, Feirer N, Fuqua C.** 2014. Mechanisms and regulation of surface interactions and biofilm formation in *Agrobacterium*. *Front Plant Sci* **5**:176.
52. **Douglas CJ, Staneloni RJ, Rubin RA, Nester EW.** 1985. Identification and genetic analysis of an *Agrobacterium tumefaciens* chromosomal virulence region. *J Bacteriol* **161**:850-60.
53. **Skerker JM, Laub MT.** 2004. Cell-cycle progression and the generation of asymmetry in *Caulobacter crescentus*. *Nat Rev Microbiol* **2**:325-37.
54. **Sadowski CS, Wilson D, Schallies KB, Walker G, Gibson KE.** 2013. The *Sinorhizobium meliloti* sensor histidine kinase CbrA contributes to free-living cell cycle regulation. *Microbiology* **159**:1552-63.
55. **Panis G, Murray SR, Viollier PH.** 2015. Versatility of global transcriptional regulators in alpha-Proteobacteria: from essential cell cycle control to ancillary functions. *FEMS Microbiol Rev* **39**:120-33.
56. **De Bolle X, Crosson S, Matroule JY, Letesson JJ.** 2015. *Brucella abortus* cell cycle and infection are coordinated. *Trends Microbiol* **23**:812-21.
57. **Quinones-Valles C, Sanchez-Osorio I, Martinez-Antonio A.** 2014. Dynamical modeling of the cell cycle and cell fate emergence in *Caulobacter crescentus*. *PLoS One* **9**:e111116.
58. **Fields AT, Navarrete CS, Zare AZ, Huang Z, Mostafavi M, Lewis JC, Rezaeiaghghi Y, Brezler BJ, Ray S, Rizzacasa AL, Barnett MJ, Long SR, Chen EJ, Chen JC.** 2012. The conserved polarity factor

- podJ1* impacts multiple cell envelope-associated functions in *Sinorhizobium meliloti*. Mol Microbiol **84**:892-920.
59. **Aldridge P, Paul R, Goymer P, Rainey P, Jenal U.** 2003. Role of the GGDEF regulator PleD in polar development of *Caulobacter crescentus*. Mol Microbiol **47**:1695-708.
60. **Lai TH, Kumagai Y, Hyodo M, Hayakawa Y, Rikihisa Y.** 2009. The *Anaplasma phagocytophilum* PleC histidine kinase and PleD diguanylate cyclase two-component system and role of cyclic di-GMP in host cell infection. J Bacteriol **191**:693-700.
61. **Radhakrishnan SK, Pritchard S, Viollier PH.** 2010. Coupling prokaryotic cell fate and division control with a bifunctional and oscillating oxidoreductase homolog. Dev Cell **18**:90-101.
62. **Pierce DL, O'Donnol DS, Allen RC, Javens JW, Quardokus EM, Brun YV.** 2006. Mutations in DivL and CckA rescue a divJ null mutant of *Caulobacter crescentus* by reducing the activity of CtrA. J Bacteriol **188**:2473-82.
63. **Schallies KB, Sadowski C, Meng J, Chien P, Gibson KE.** 2015. *Sinorhizobium meliloti* CtrA Stability Is Regulated in a CbrA-Dependent Manner That Is Influenced by CpdR1. J Bacteriol **197**:2139-49.
64. **Rotter C, Muhlbacher S, Salamon D, Schmitt R, Scharf B.** 2006. Rem, a new transcriptional activator of motility and chemotaxis in *Sinorhizobium meliloti*. J Bacteriol **188**:6932-42.
65. **Margolin W.** 2009. Sculpting the bacterial cell. Curr Biol **19**:R812-22.
66. **Anderson-Furgeson JC, Zupan JR, Grangeon R, Zambryski PC.** 2016. Loss of PodJ in *Agrobacterium tumefaciens* leads to ectopic polar growth, branching, and reduced cell division. J Bacteriol doi:10.1128/JB.00198-16.
67. **Grangeon R, Zupan JR, Anderson-Furgeson J, Zambryski PC.** 2015. PopZ identifies the new pole, and PodJ identifies the old pole during polar growth in *Agrobacterium tumefaciens*. Proc Natl Acad Sci U S A **112**:11666-71.
68. **Gibson KE, Barnett MJ, Toman CJ, Long SR, Walker GC.** 2007. The symbiosis regulator CbrA modulates a complex regulatory network affecting the flagellar apparatus and cell envelope proteins. J Bacteriol **189**:3591-602.
69. **Tempe J, Petit A, Holsters M, Montagu MV, Schell J.** 1977. Thermosensitive step associated with transfer of Ti plasmid during conjugation - possible relation to transformation in crown gall. Proceedings of the National Academy of Sciences of the United States of America **74**:2848-2849.
70. **Morton ER, Fuqua C.** 2012. Laboratory maintenance of *Agrobacterium*. Curr Protoc Microbiol Chapter 1:Unit3D 1.
71. **Heindl JE, Hibbing ME, Xu J, Natarajan R, Buechlein AM, Fuqua C.** 2015. Discrete responses to limitation for iron and manganese in *Agrobacterium tumefaciens*: Influence on attachment and biofilm formation. J Bacteriol **198**:816-29.
72. **Ritchie ME, Phipson B, Wu D, Hu Y, Law CW, Shi W, Smyth GK.** 2015. limma powers differential expression analyses for RNA-sequencing and microarray studies. Nucleic Acids Res **43**:e47.
73. **R Core Team.** 2016. R: A language and environment for statistical computing., on R Foundation for Statistical Computing. <https://www.R-project.org>. Accessed
74. **Edgar R, Domrachev M, Lash AE.** 2002. Gene Expression Omnibus: NCBI gene expression and hybridization array data repository. Nucleic Acids Res **30**:207-10.
75. **Miller JH.** 1972. Experiments in Molecular Genetics. Cold Spring Harbor, New York.
76. **Wang Y, Kim SH, Natarajan R, Heindl JE, Bruger EL, Waters CM, Michael AJ, Fuqua C.** 2016. Spermidine inversely influences surface interactions and planktonic growth in *Agrobacterium tumefaciens*. J Bacteriol **198**:2682-91.

# Tables

**Table 1. Promoter activity of selected known and predicted CtrA-dependent promoters.<sup>a</sup>**

| Strain                | Promoter source organism | Promoter     | Activity (%WT $\pm$ SE)   |
|-----------------------|--------------------------|--------------|---------------------------|
| WT                    | <i>C. crescentus</i>     | <i>ccrM</i>  | 100 $\pm$ 1               |
|                       |                          | <i>ctrA</i>  | 100 $\pm$ 2               |
|                       |                          | <i>pilA</i>  | 100 $\pm$ 1               |
|                       | <i>A. tumefaciens</i>    | <i>ccrM</i>  | 100 $\pm$ 1               |
|                       |                          | <i>ctrA</i>  | 101 $\pm$ 1               |
|                       |                          | <i>pdhS1</i> | 100 $\pm$ 1               |
|                       |                          | <i>dgcB</i>  | 100 $\pm$ 12              |
|                       |                          | Atu3318      | 104 $\pm$ 25              |
| $\Delta$ <i>pdhS2</i> | <i>C. crescentus</i>     | <i>ccrM</i>  | 109 $\pm$ 12              |
|                       |                          | <i>ctrA</i>  | 82 $\pm$ 4 <sup>b</sup>   |
|                       |                          | <i>pilA</i>  | 85 $\pm$ 2 <sup>b</sup>   |
|                       | <i>A. tumefaciens</i>    | <i>ccrM</i>  | 106 $\pm$ 2 <sup>b</sup>  |
|                       |                          | <i>ctrA</i>  | 84 $\pm$ 3 <sup>b</sup>   |
|                       |                          | <i>pdhS1</i> | 119 $\pm$ 3 <sup>b</sup>  |
|                       |                          | <i>dgcB</i>  | 201 $\pm$ 26 <sup>b</sup> |
|                       |                          | Atu3318      | 352 $\pm$ 13 <sup>b</sup> |
| $\Delta$ <i>divK</i>  | <i>C. crescentus</i>     | <i>ccrM</i>  | 140 $\pm$ 6 <sup>b</sup>  |
|                       |                          | <i>ctrA</i>  | 132 $\pm$ 4 <sup>b</sup>  |
|                       |                          | <i>pilA</i>  | 99 $\pm$ 3                |
|                       | <i>A. tumefaciens</i>    | <i>ccrM</i>  | 116 $\pm$ 3 <sup>b</sup>  |
|                       |                          | <i>ctrA</i>  | 117 $\pm$ 2 <sup>b</sup>  |
|                       |                          | <i>pdhS1</i> | 90 $\pm$ 1 <sup>b</sup>   |
|                       |                          | <i>dgcB</i>  | N.D. <sup>c</sup>         |
|                       |                          | Atu3318      | N.D. <sup>c</sup>         |

<sup>a</sup> Promoter activity was measured as  $\beta$ -galactosidase activity of cell lysates from strains carrying either transcriptional (for *C. crescentus* promoters) or translational (for *A. tumefaciens* promoters) fusions of the indicated promoter regions to the *E. coli lacZ* gene. Activity for each promoter was normalized to activity in lysates from wild-type cells carrying the identical promoter. N = 9.

1028

1029   <sup>b</sup>  $P < 0.05$  compared to WT value using Student's  $t$  test.

1030

1031   <sup>c</sup> N.D., not determined.

1032



1033 **Table 2. Differentially-regulated genes in the absence of *pdhS2*.<sup>a</sup>**

| Locus ID | Gene         | Product <sup>b</sup>                                         | log <sub>2</sub> FC | CtrA site? <sup>c</sup> | Present in other PdhS arrays? <sup>d</sup> |
|----------|--------------|--------------------------------------------------------------|---------------------|-------------------------|--------------------------------------------|
| Atu0461  | -            | <i>phage tail protein/type VI secretion system component</i> | 2.42                | yes                     | no                                         |
| Atu0227  | -            | tRNA-Leu                                                     | 2.15                | no                      | no                                         |
| Atu5167  | <i>avhB6</i> | type IV secretion protein                                    | 2.01                | no                      | no                                         |
| Atu2490  | <i>asd</i>   | aspartate semialdehyde dehydrogenase                         | 1.93                | no                      | no                                         |
| Atu3318  | -            | LuxR family transcriptional regulator                        | 1.84                | yes                     | no                                         |
| Atu1471  | <i>rluC</i>  | ribosomal large subunit pseudouridine synthase C             | 1.84                | no                      | no                                         |
| Atu3755  | <i>purK</i>  | phosphoribosylaminoimidazole carboxylase ATPase subunit      | 1.70                | no                      | no                                         |
| Atu3606  | <i>ftsE</i>  | cell division ATP-binding protein                            | 1.63                | no                      | no                                         |
| Atu1791  | -            | ABC transporter, membrane spanning protein (sugar)           | 1.55                | yes                     | no                                         |
| Atu3572  | -            | XRE family transcriptional regulator                         | 1.52                | no                      | yes                                        |
| Atu2217  | -            | <i>hypothetical protein</i>                                  | 1.52                | no                      | no                                         |
| Atu5119  | <i>phoB</i>  | two component response regulator                             | 1.48                | no                      | no                                         |
| Atu3031  | -            | <i>hypothetical protein</i>                                  | 1.46                | no                      | no                                         |
| Atu1886  | -            | <i>DNA glycosylase</i>                                       | 1.41                | no                      | no                                         |
| Atu1964  | -            | tRNA-Trp                                                     | 1.40                | no                      | no                                         |
| Atu1301  | -            | <i>Nudix hydrolase</i>                                       | 1.39                | no                      | no                                         |
| Atu3610  | -            | cation transporter                                           | 1.34                | no                      | no                                         |
| Atu6048  | -            | <i>RNA helicase</i>                                          | 1.32                | no                      | no                                         |
| Atu1691  | <i>dgcB</i>  | GGDEF family protein                                         | 1.32                | yes                     | no                                         |
| Atu1887  | <i>exol</i>  | succinoglycan biosynthesis protein                           | 1.30                | no                      | no                                         |
| Atu1134  | -            | <i>lysyl-phosphatidylglycerol synthase</i>                   | 1.30                | no                      | no                                         |
| Atu2665  | -            | MarR family transcriptional regulator                        | 1.27                | no                      | no                                         |
| Atu2204  | -            | <i>hypothetical protein</i>                                  | 1.25                | yes                     | no                                         |
| Atu0540  | -            | <i>hypothetical protein</i>                                  | 1.25                | no                      | no                                         |
| Atu4856  | -            | nucleotidyltransferase                                       | -1.21               | no                      | no                                         |
| Atu4347  | <i>tae</i>   | type VI secreted effector                                    | -1.23               | yes                     | no                                         |
| Atu4055  | <i>exoK</i>  | endo-1,3-1,4-beta-glycanase                                  | -1.28               | yes                     | yes                                        |
| Atu4345  | <i>tssD</i>  | type VI secretion needle tube protein                        | -1.29               | yes                     | no                                         |
| Atu5091  | <i>rcdB</i>  | curdian synthesis protein                                    | -1.32               | yes                     | no                                         |
| Atu4357  | -            | <i>transglutaminase-like Cys protease</i>                    | -1.34               | no                      | yes                                        |
| Atu0343  | <i>barA</i>  | two component sensor kinase/response regulator hybrid        | -1.37               | no                      | no                                         |
| Atu4053  | <i>exoA</i>  | succinoglycan biosynthesis protein                           | -1.42               | yes                     | yes                                        |
| Atu4056  | <i>exoH</i>  | succinoglycan biosynthesis protein                           | -1.42               | yes                     | yes                                        |
| Atu3564  | <i>exsH</i>  | endo-1,3-1,4-beta-glycanase                                  | -1.46               | no                      | no                                         |
| Atu3541  | -            | <i>transglutaminase-like Cys protease</i>                    | -1.51               | no                      | no                                         |

|         |             |                                                    |       |     |     |
|---------|-------------|----------------------------------------------------|-------|-----|-----|
| Atu4627 | -           | <i>hypothetical protein</i>                        | -1.56 | no  | no  |
| Atu4049 | <i>exoP</i> | exopolysaccharide polymerization/transport protein | -1.64 | no  | no  |
| Atu1469 | -           | hypothetical protein                               | -1.80 | yes | no  |
| Atu4050 | <i>exoN</i> | UTP-glucose-1-phosphate uridylyltransferase        | -1.82 | no  | yes |

<sup>a</sup> Gene expression was compared between WT and  $\Delta pdhS2$  strains using whole-genome microarrays. Genes were defined as differentially regulated when the following conditions were met:  $\log_2 FC \geq 0.50$  OR  $\log_2 FC \leq -0.50$ , AND  $P < 0.050$ , AND  $Q < 0.10$ .

<sup>b</sup> Predicted functions of hypothetical proteins, if available, are italicized.

<sup>c</sup> 500 nt upstream and 100 nt downstream of start codon for each gene (or operon, if applicable) was scanned for possible CtrA binding sites, as described in the text.

<sup>d</sup> Results were compared with previously published *S. meliloti cbrA* and *divJ* microarrays and *C. crescentus divJ* and *pleC* microarrays, as described in the text.



# Figure Legends

## Figure 1. The PdhS kinases of *C. crescentus* and *A. tumefaciens* differentially

localize and affect phenotypic outputs through response regulators DivK, PleD,

and CtrA. (A) Cartoon model of known localization of the namesake PdhS kinases from

*C. crescentus*, PleC and DivJ, and two PdhS kinases from *A. tumefaciens*, PdhS2 and

DivJ. Kinases represented as colored ovals with black border experimentally localize to

the indicated poles. Ovals without border have not been experimentally demonstrated to

localize. As a result of this localization phosphorylation status of direct PdhS kinase

targets, DivK and PleD, and the indirect target, CtrA, is differentially affected. (B)

Multiple sequence alignment of the HisKA domain from the PdhS kinases of *C.*

*crescentus* and *A. tumefaciens*. Sequences were aligned using the Clustal Omega web

service hosted by the European Molecular Biology Laboratory (EMBL)-European

Bioinformatics Institute. The four PdhS kinases from *A. tumefaciens* plus PleC and DivJ

from *C. crescentus* were included. Also included are two additional predicted PdhS

kinases, CC\_0652 and CC\_1062, from *C. crescentus*. The EnvZ sensor kinase is

included for comparison. Yellow highlighting indicates defining residues for the PdhS

kinases. The conserved histidine and threonine residues mutated in this work are in

bold. (C) Domain architecture of PdhS2 and DivJ from *A. tumefaciens* as determined

using the Simple Modular Architecture Research Tool hosted by EMBL. The C-terminal

HisKA and HATPase\_c domains are labeled. Blue bars represent predicted

transmembrane domains. Purple dashes indicate low complexity domains.

## Figure 2. PdhS2 lies upstream of DivK and is predominated by phosphatase

**activity.** (A) Static biofilm formation after 48 h (black bars) and swim ring diameter after 7 days (white bars) of the indicated wild-type and mutant strains. Adherent biomass on PVC coverslips was determined by adsorption of crystal violet. Crystal violet was then solubilized and  $A_{600\text{ nm}}$  measured. Crystal violet absorbance was normalized to culture density. Data are the mean of three independent experiments each of which contained three technical replicates ( $N = 3$ ). Swim ring diameters were measure after single-colony inoculation into low density swim agar and incubation at room temperature. Data are the mean of nine independent experiments ( $N = 9$ ). (B) The ability of plasmid-borne wild-type PdhS2 (*p-pdhS2*), the kinase-null allele (*p-pdhS2* ( $K^+P^+$ )), or the phosphatase-null allele (*p-pdhS2* ( $K^+P^-$ )) to complement the  $\Delta pdhS2$  biofilm formation (black bars) and swimming motility (white bars) phenotypes was evaluated using  $P_{lac}$ -driven expression of each allele. Experiments were performed and data analyzed as described for (A) above. (C) The effect of plasmid-borne wild-type PdhS2 (*p-pdhS2*), the kinase-null allele (*p-pdhS2* ( $K^+P^+$ )), or the phosphatase-null allele (*p-pdhS2* ( $K^+P^-$ )) on biofilm formation (black bars) and swimming motility (white bars) when expressed from the  $P_{lac}$  promoter in the  $\Delta divK$  mutant background was evaluated as in (A) and (B) above. For presentation all data are normalized to WT and expressed as %WT  $\pm$  standard error of the mean (S.E.).

## Figure 3. PdhS2 and DivJ are polarly localized in *A. tumefaciens*. Time-lapse

microscopy of a C-terminal green fluorescent protein fusion to PdhS2 (A) and DivJ (B).

Phase and fluorescent images were acquired sequentially and overlaid. Time between panels is 40 minutes. To the right of each image is a cartoon interpretation of the image.

**Figure 4. PdhS2 impacts CtrA abundance but not turnover kinetics.** (A) Steady-state CtrA levels in indicated strains as determined via SDS-PAGE followed by immunoblotting with rabbit anti-CtrA<sub>CC</sub> primary and IRDye 800CW-conjugated goat anti-rabbit secondary antibodies. (B) Proteolytic turnover of CtrA following translational arrest with chloramphenicol. Aliquots were removed at the indicated time points, lysed, and stored frozen at -20 °C. CtrA levels were then determined via SDS-PAGE followed by immunoblotting, as described for (A) above. Blots were imaged using an LI-COR Odyssey Classic infrared imaging system and band intensities quantified with the Odyssey Classic software. Protein concentrations for each sample were normalized prior to electrophoresis.

**Figure 5. PdhS2 activity intersects with the activity of multiple diguanylate cyclases.** (A) Biofilm formation was quantified for the wild-type (WT) and indicated mutant strains as described in Figure 2. PleD, DgcA, DgcB have demonstrated diguanylate cyclase enzymatic activity. Thus far conditions under DgcC is active have yet to be identified.  $P < 0.05$  compared to WT (<sup>a</sup>), *DpdhS2* (<sup>b</sup>), or corresponding diguanylate cyclase (<sup>c</sup>). (B) The effect on biofilm formation of plasmid-borne expression of wild-type *dgcB* (p-*dgcB*) or a catalytic mutant allele of *dgcB* (p-*dgcB*<sup>\*</sup>) was evaluated. Expression of each *dgcB* allele was driven by the *P<sub>lac</sub>* promoter. Biofilm formation was evaluated as described in Figure 2. (\*) =  $P < 0.05$  compared to vector alone.

**Figure S1. A combined kinase- and phosphatase-null PdhS2 mutant allele has little effect on biofilm formation or swimming motility.** The ability of plasmid-borne expression of a kinase- and phosphatase- null allele of *pdhS2* (p-*pdhS2* (K<sup>-</sup>P<sup>-</sup>)) to complement the  $\Delta$ *pdhS2* phenotypes was compared against the wild-type *pdhS2* allele (p-*pdhS2*). Biofilm formation (black bars) and swimming motility (white bars) were evaluated as in Figure 2.

**Figure S2. The PdhS kinases are not entirely redundant in regulating biofilm formation.** Biofilm formation was evaluated in the wild-type (WT) and indicated mutant strains as described in Figure 2.

**Figure S3. PdhS2 regulation of swimming motility is independent of diguanylate cyclase activity.** (A) Swimming motility of the wild-type (WT) and indicated mutant strains was evaluated as described in Figure 2.  $P < 0.05$  compared to WT (<sup>a</sup>), *DpdhS2* (<sup>b</sup>), or corresponding diguanylate cyclase (<sup>c</sup>). (B) The effect on swimming motility of plasmid-borne expression of wild-type *dgcB* (p-*dgcB*) or a catalytic mutant allele of *dgcB* (p-*dgcB*<sup>\*</sup>) was evaluated. Expression of each *dgcB* allele was driven by the  $P_{lac}$  promoter. Biofilm formation was evaluated as described in Figure 2. (\*) =  $P < 0.05$  compared to vector alone.

**Figure S4. The unipolar polysaccharide is required for PdhS2-dependent biofilm formation.** (A) Biofilm formation was evaluated in the presence (+) or absence (-) of

*pdhS2* in combination with the indicated polysaccharides. WT = wild-type, Cel<sup>-</sup> = cellulose mutant, ChvAB<sup>-</sup> = cyclic-β-glucan mutant, CrdS<sup>-</sup> = curdlan mutant, ExoA<sup>-</sup> = succinoglycan mutant, UPP<sup>-</sup> = unipolar polysaccharide mutant, EPS<sup>-</sup> = mutant lacking all of the above polysaccharides. (B) Swimming motility was evaluated in the same strains as in (A). (\*) =  $P < 0.05$  compared to background strain.

**Figure S5. PdhS2 does not affect global levels of cyclic-di-GMP.** Cyclic-di-GMP levels were measured in whole cell extracts from equivalent ODs of the indicated strains. Data are from three independent experiments (N = 3).

Figure 1A

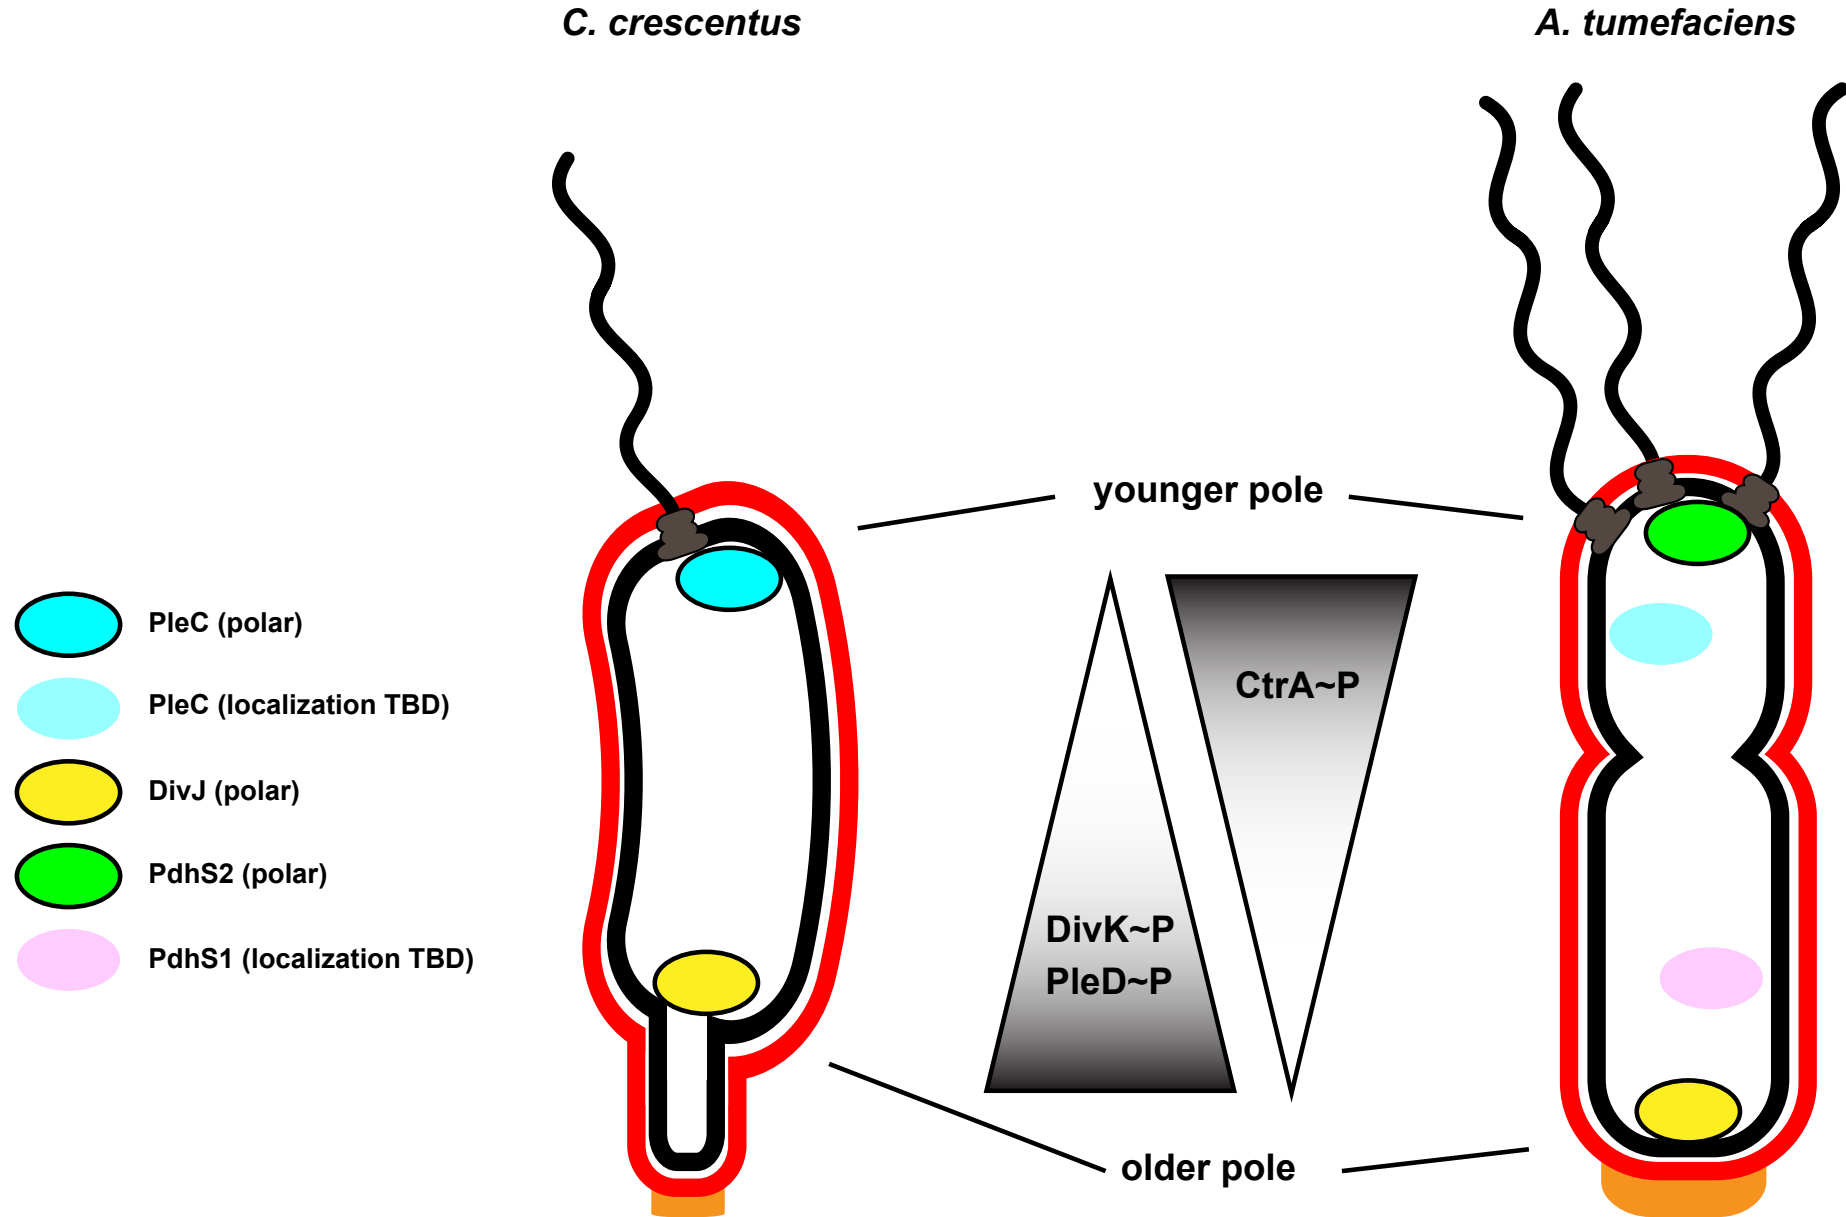

### Figure 1B

|                 |        |          |            |       |       |            |                  |           |          |          |
|-----------------|--------|----------|------------|-------|-------|------------|------------------|-----------|----------|----------|
| Atu1888 (PdhS2) | NLAKSR | FLASM    | SHELR      | RTPLN | AILGF | SEVMSSEVLG | PLNNPLYKE        | YSGDIHRS  | QGHLLDLI | NEILDLSR |
| Atu0921 (DivJ)  | NDAKSR | FLAAV    | SHELR      | RTPLN | AVLGF | SDILAGEYF  | GRLENDRQRE       | YVGLIRQS  | GAHLLSVV | NTMLDMSK |
| Atu0982 (PleC)  | NRAKSE | FLANM    | SHELR      | RTPLN | AILGF | SEILQNEFM  | GPVGPSPKYSE      | YARDIHDS  | GKHLNVI  | NDILDMSK |
| Atu0614 (PdhS1) | NAHKTD | FLARV    | SHEIR      | RTPLN | AIIGF | SDMMATERF  | GPIGNPRYVE       | YANDIGRS  | GRHVLDIV | NDLLDISK |
| CC_1063 (DivJ)  | ---    | RARFLANM | SHELR      | RTPLN | AIMGF | SDIMRARMF  | GPLSD-RYAE       | YAEI HES  | GGHLLDLI | NTMLDMSK |
| CC_2482 (PleC)  | NKAKSE | FLANM    | SHELR      | RTPLN | AINGF | SEIMMNEFM  | GPLGDQRYKG       | YSQDIHSS  | QGHLLALI | NDILDMSK |
| CC_0652         | LEARSA | FLANM    | SHELR      | RTPLT | AVIGF | AALVEGLDDL | P---ETARD        | YVGRISTAG | KALLSVI  | NDVLEMSK |
| CC_1062         | EERKRS | FLRMV    | SHELR      | RTPLN | AVIGF | SEILSQELYG | PLGSPQYRE        | YATIVHDS  | GLKLLKLV | NQIVELAR |
|                 | :      | ::       | :**::****. | :     | :     | :          | :                | :         | :::      | :::      |
| EnvZ            | ---    | RTL      | LMAGVS     | HDLR  | TPL   | TRIRL      | ATEMMSE-QDGYLAES | SINK---   | DIEE---  | CNAII    |

**Figure 1C**

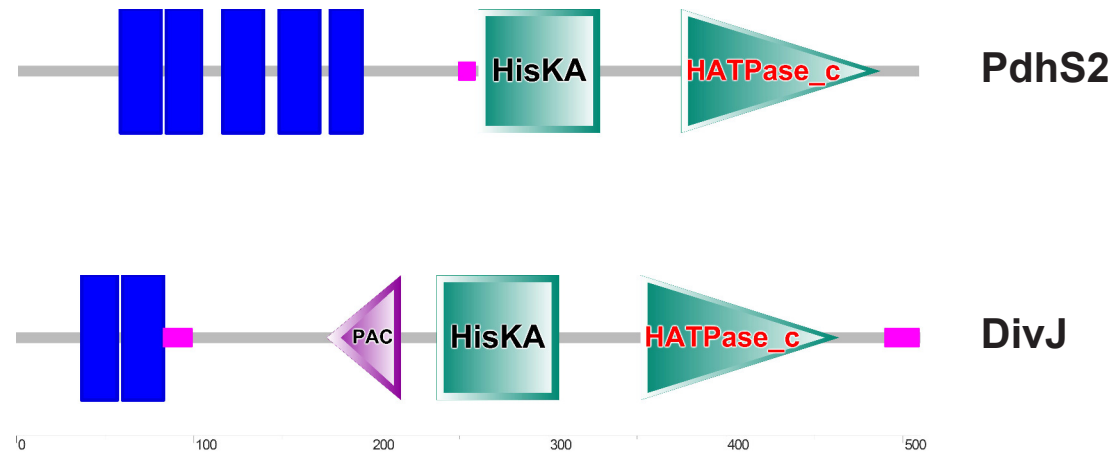



Figure 2A

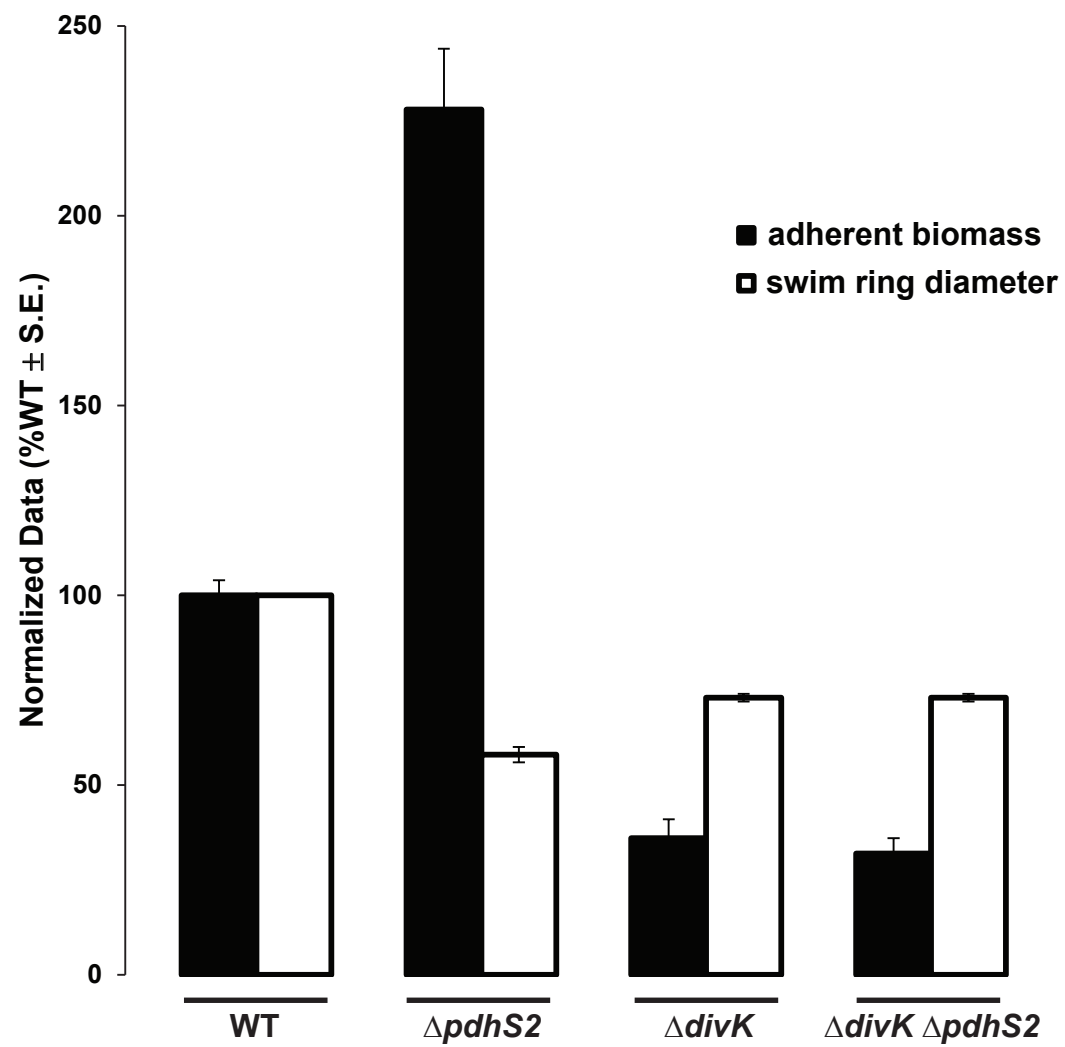

Figure 2B

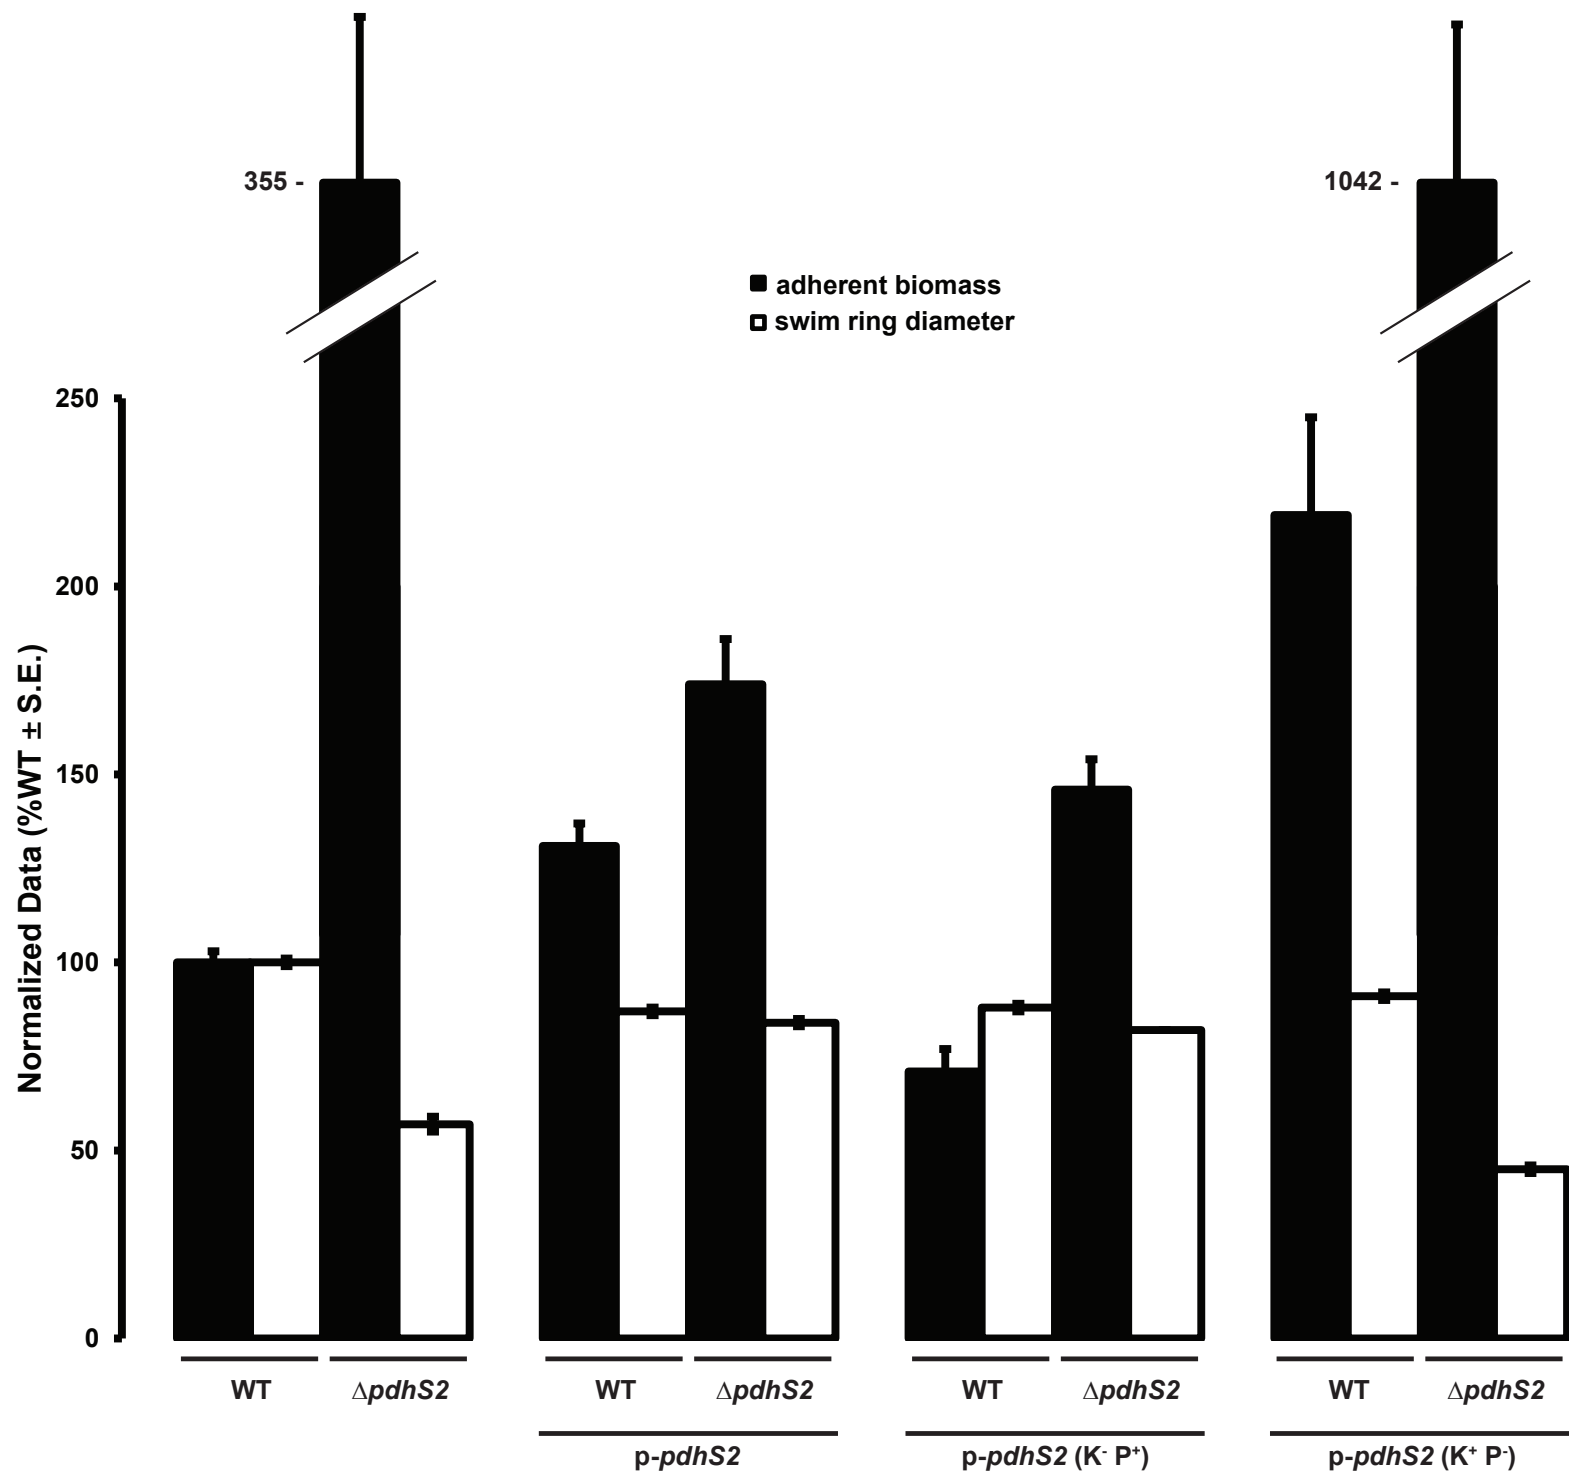

Figure 2C

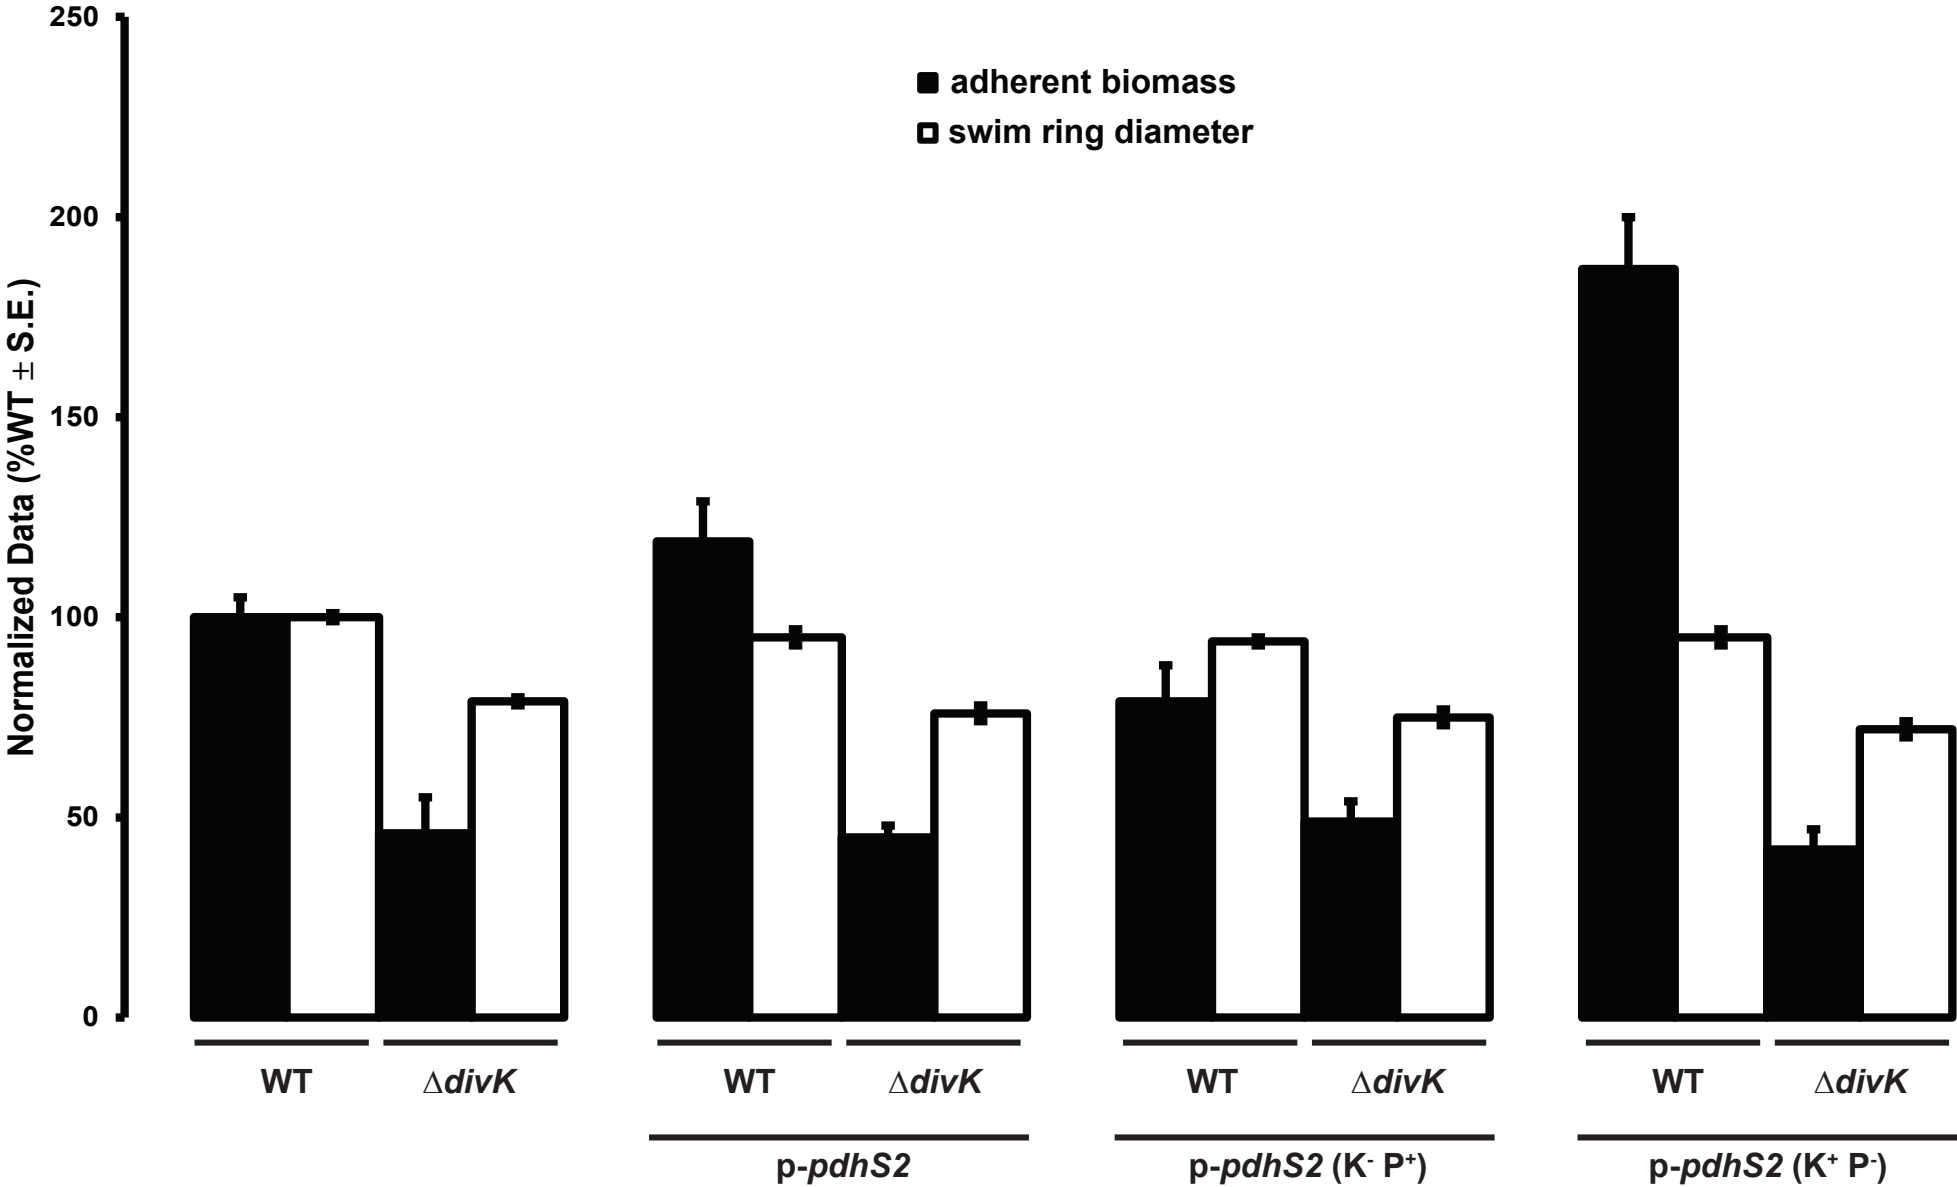

## Figure 3

**A**

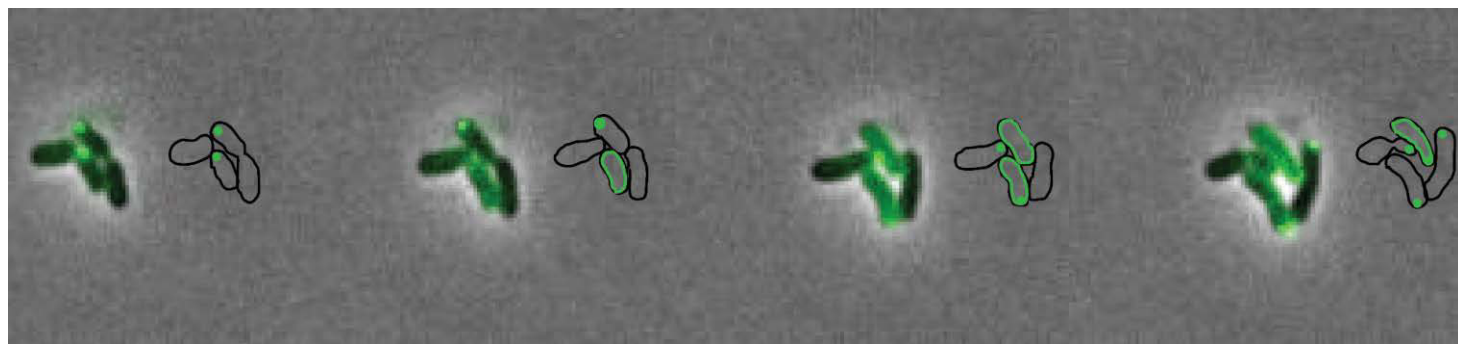

**B**

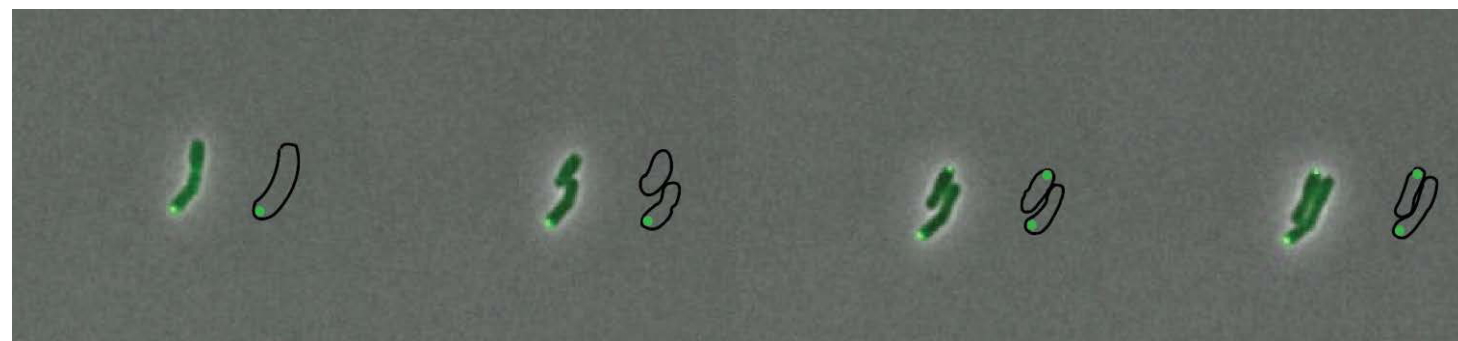

Figure 4A

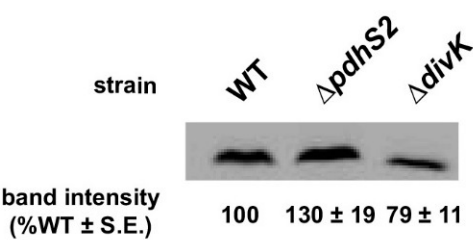

Figure 4B

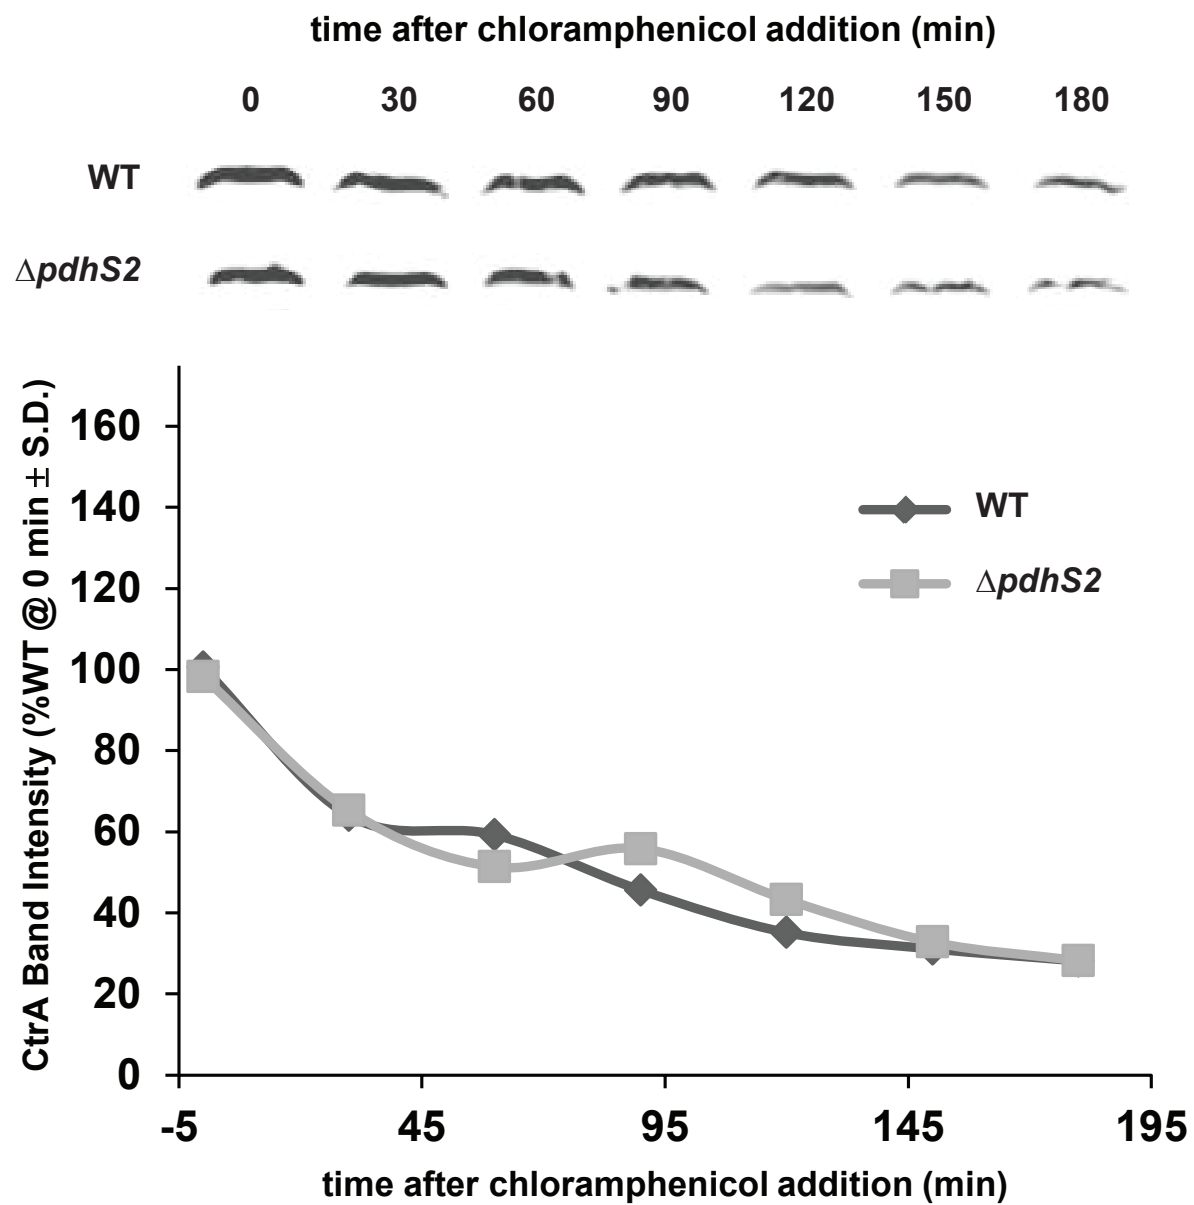

Figure 5A

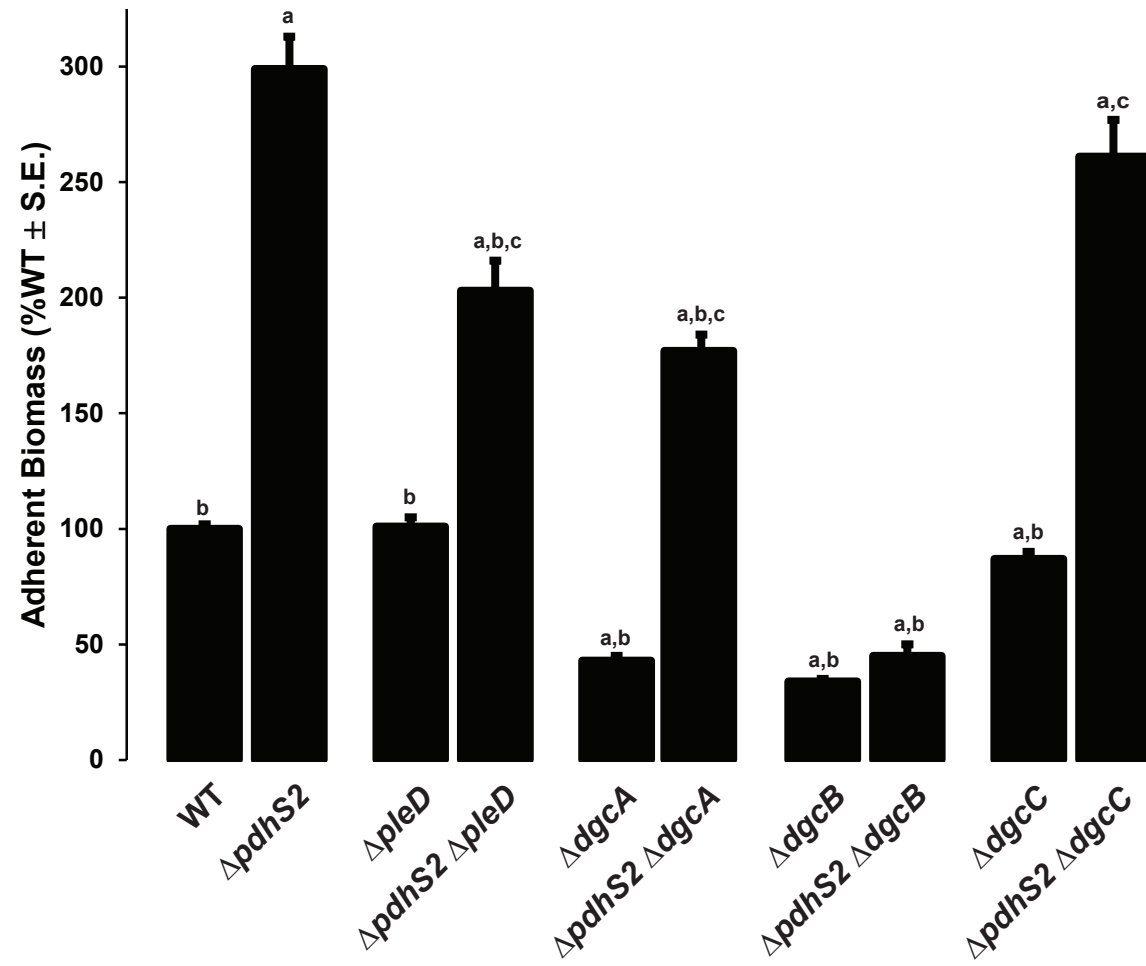

Figure 5B

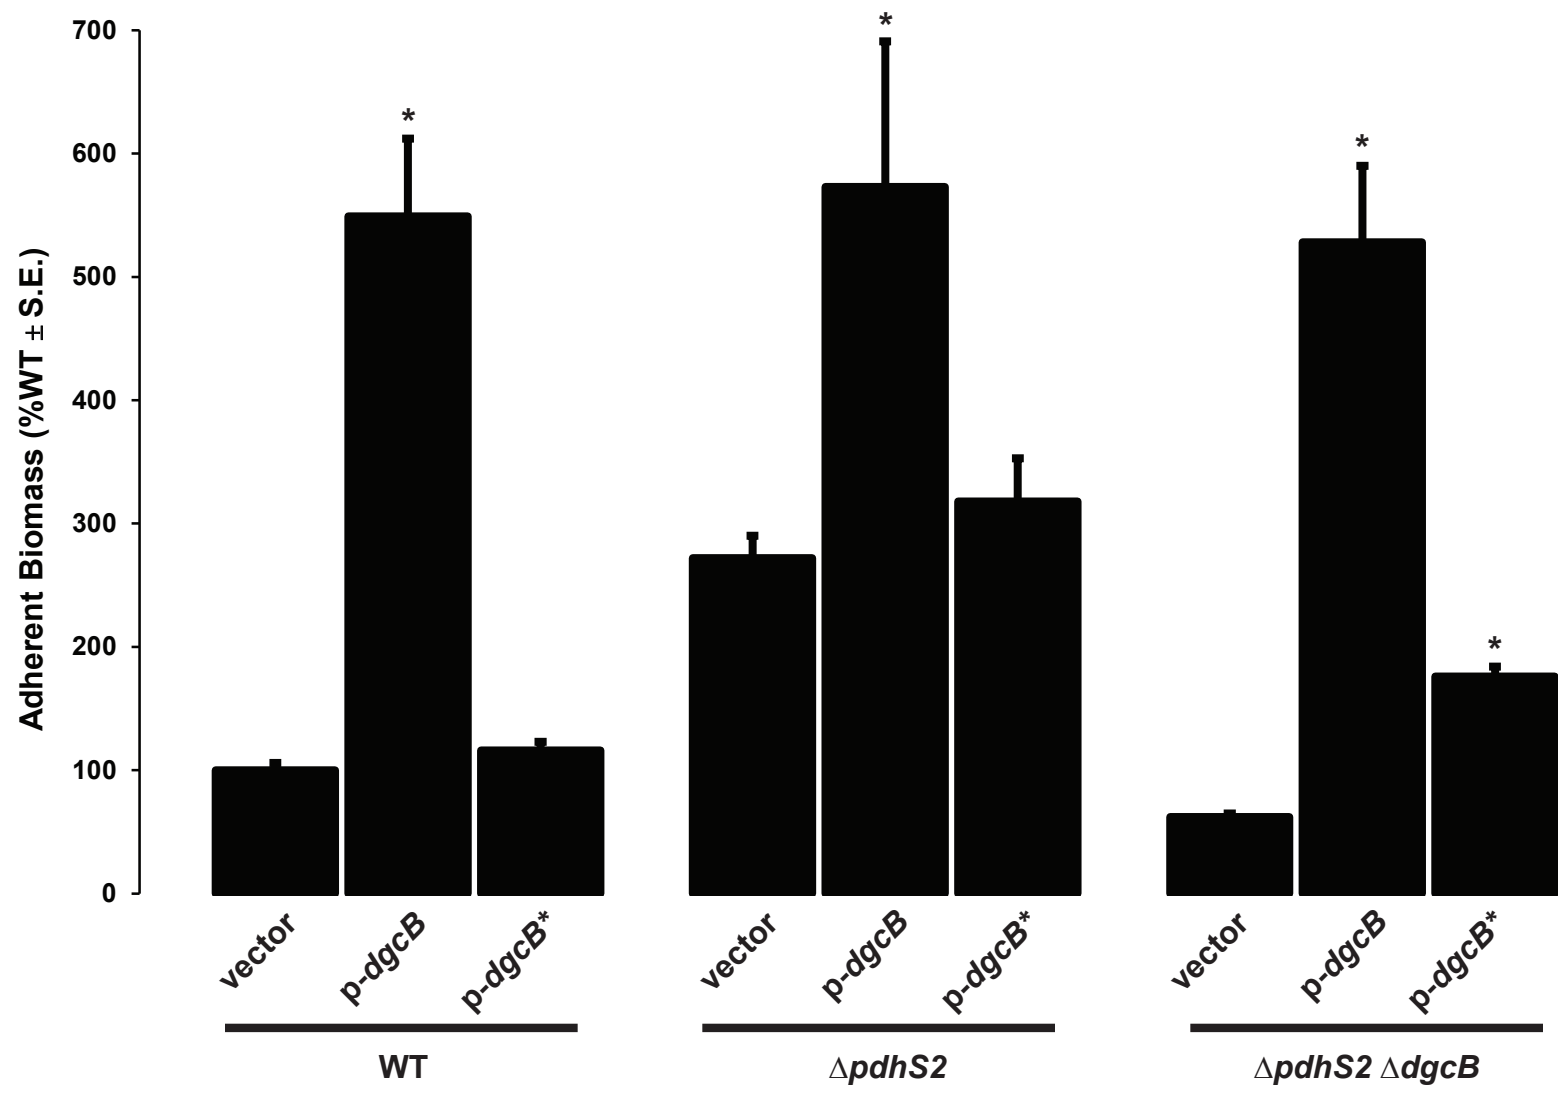



## SUPPLEMENTARY MATERIAL

### **Reciprocal control of motility and biofilm formation by the PdhS2 two-component sensor kinase of *Agrobacterium tumefaciens***

Jason E. Heindl, Daniel Crosby, Sukhdev Brar, Daniel Merenich, Aaron M. Buechlein,  
Eric L. Bruger, Christopher M. Waters and Clay Fuqua

Running title: *Agrobacterium PdhS2 regulates motility and biofilms*

- 1) Supplementary Figures – S1-S5
- 2) Supplementary Figure Legends
- 3) Supplementary Tables – S1-S3
- 4) Supplementary References

Figure S1

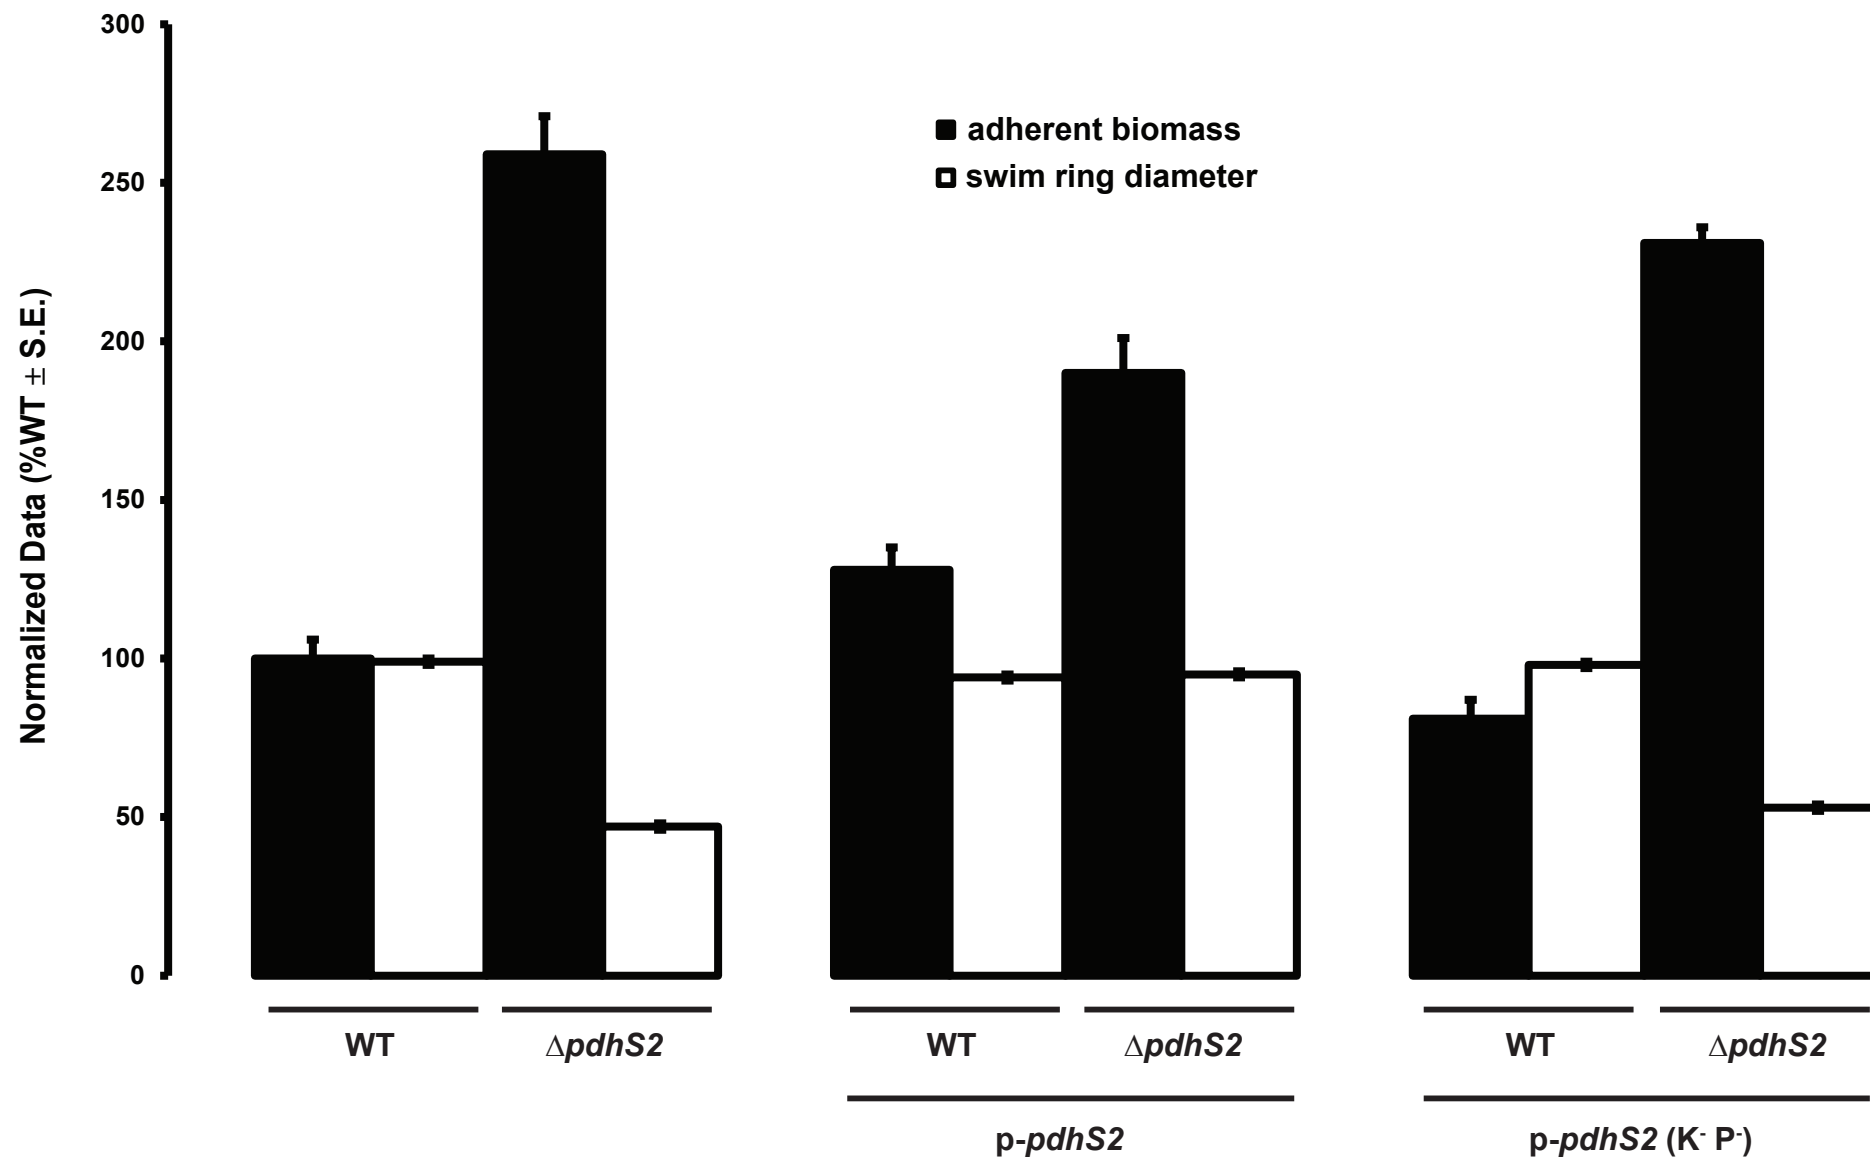

Figure S2

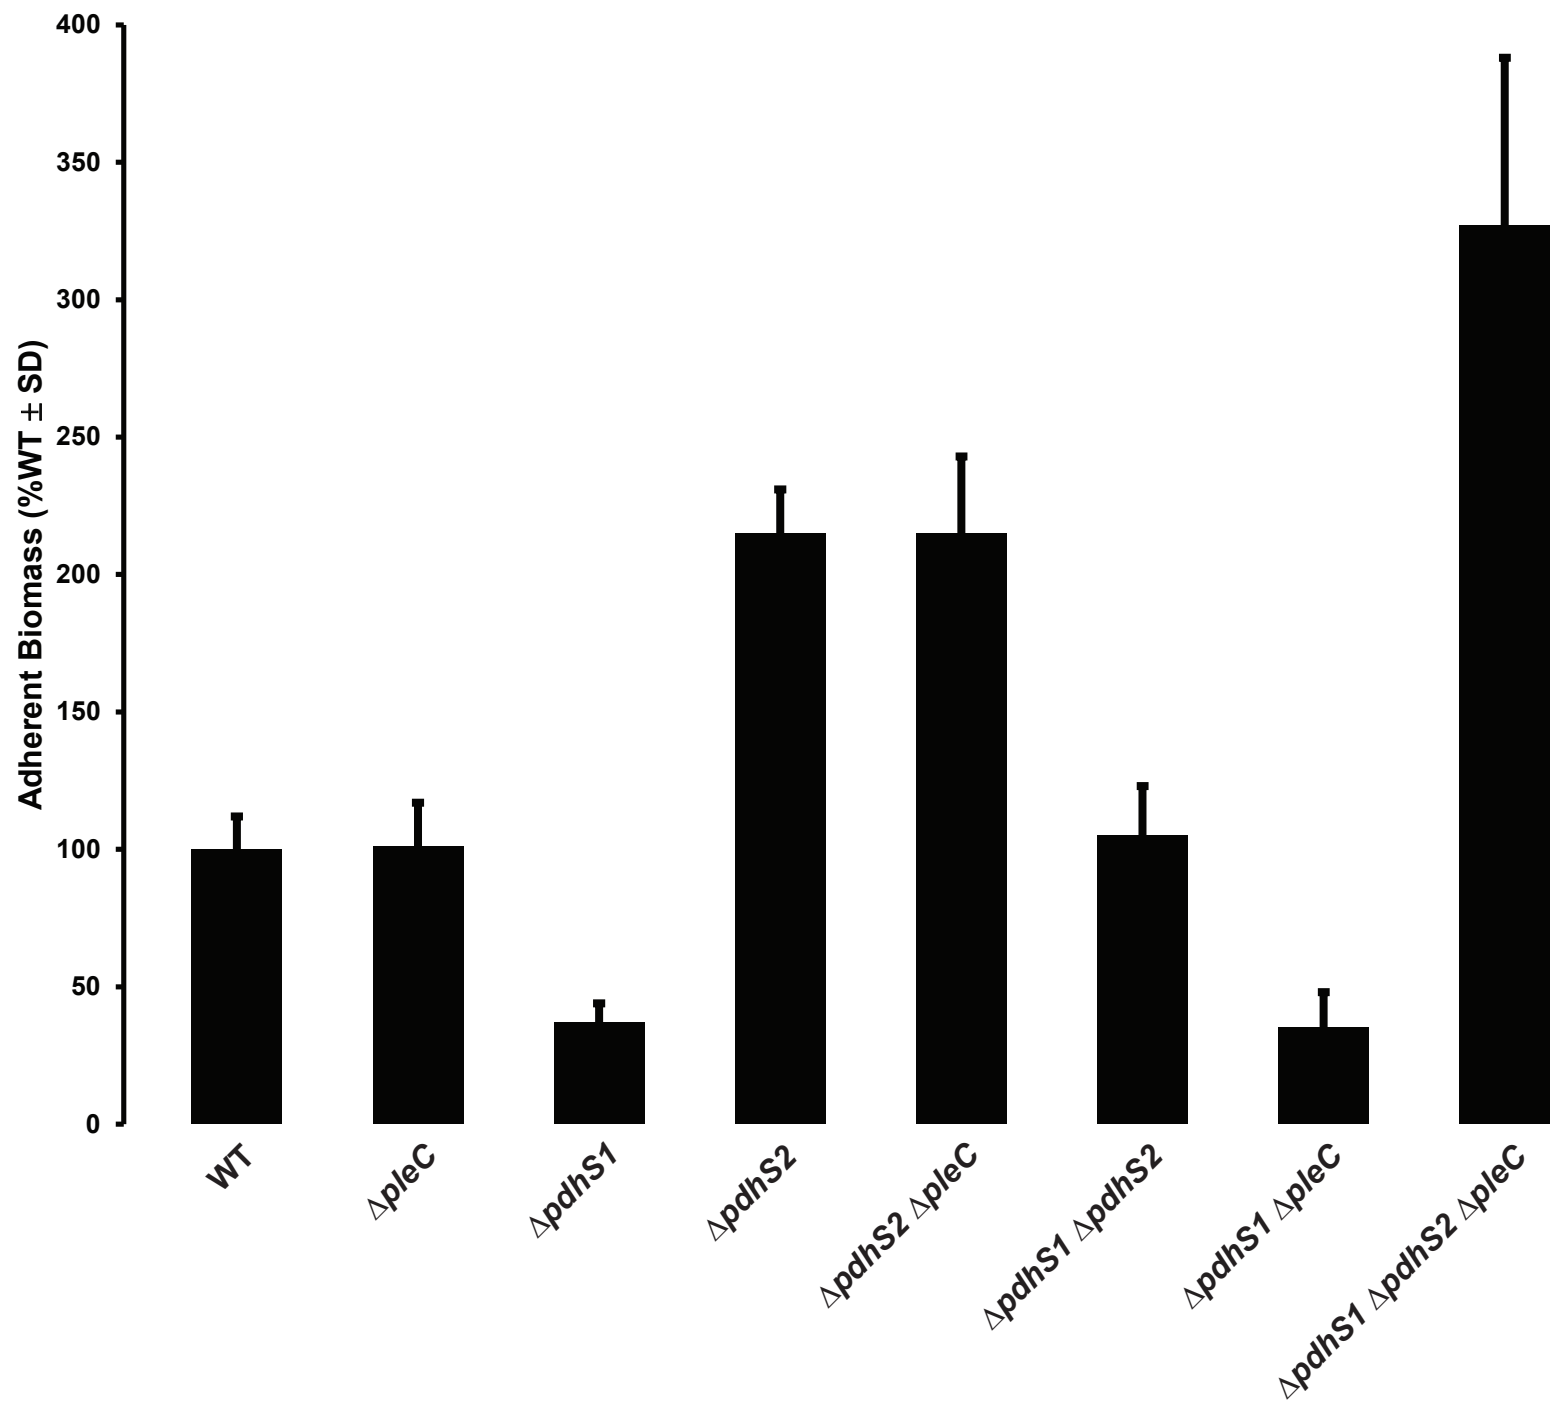

Figure S3A

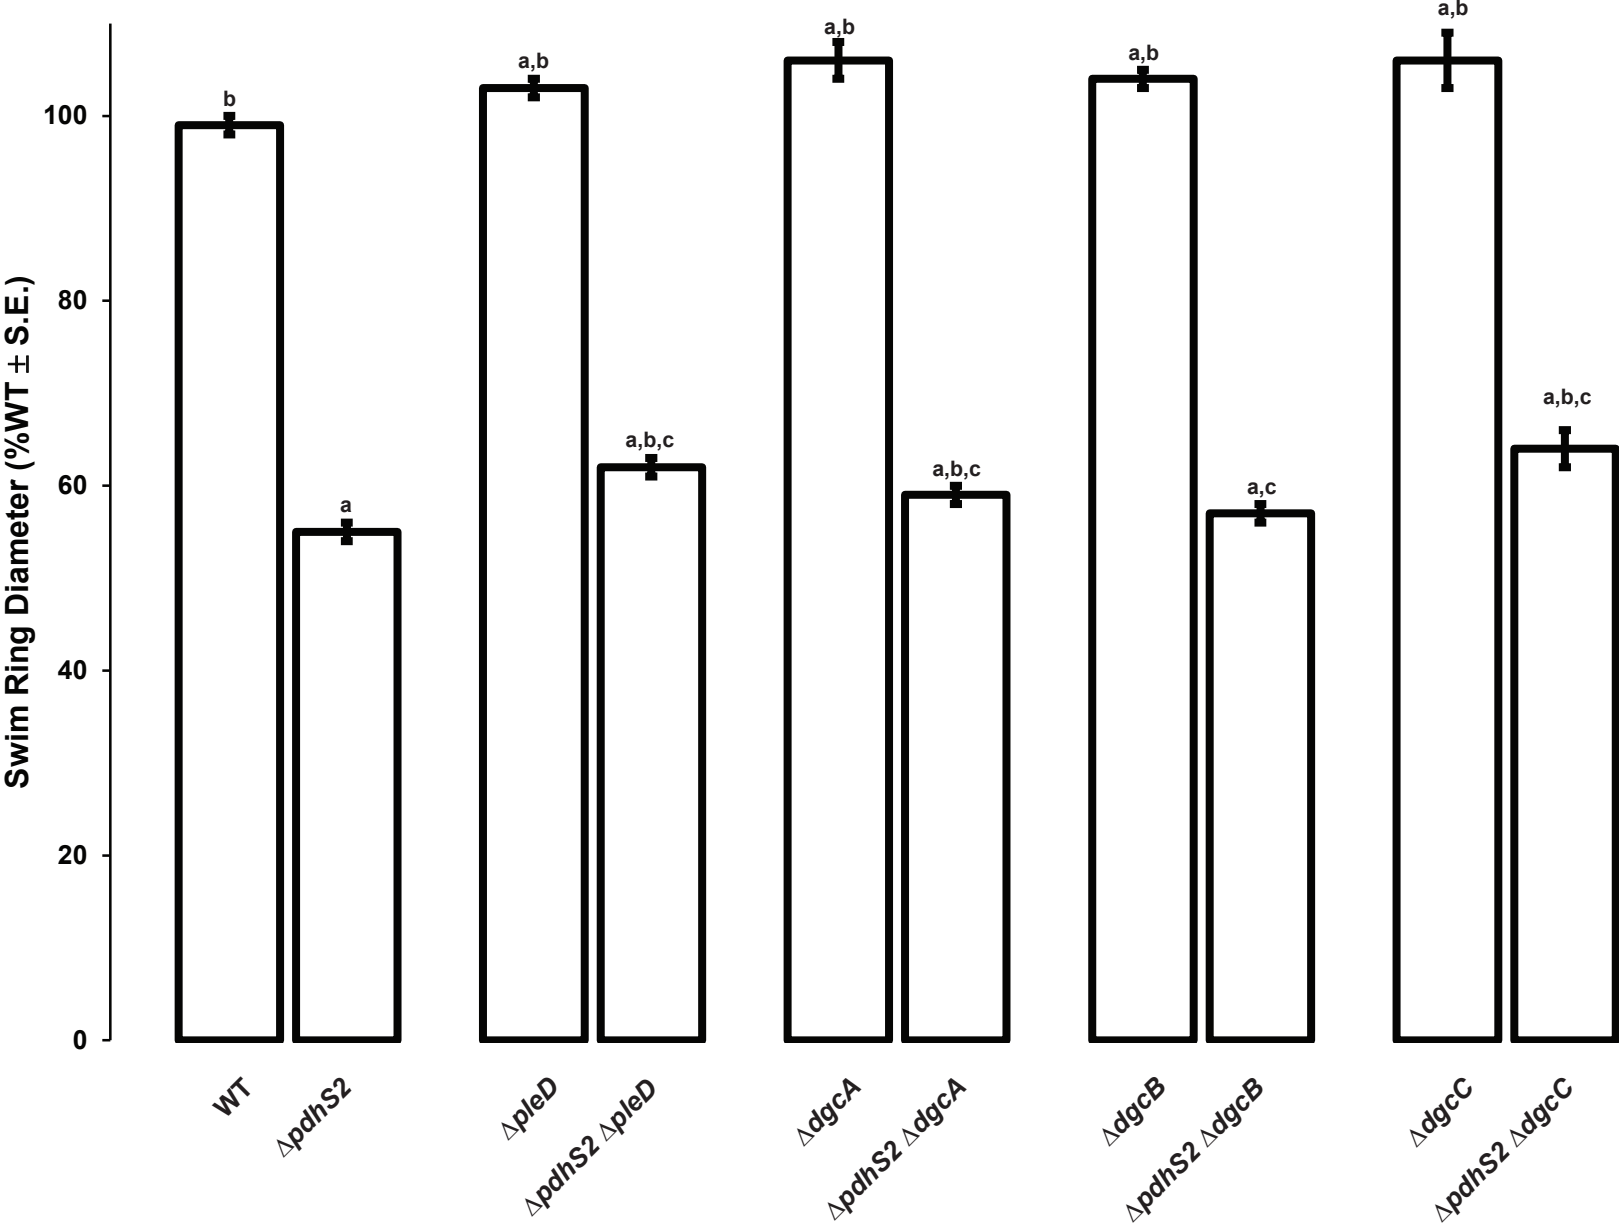

Figure S3B

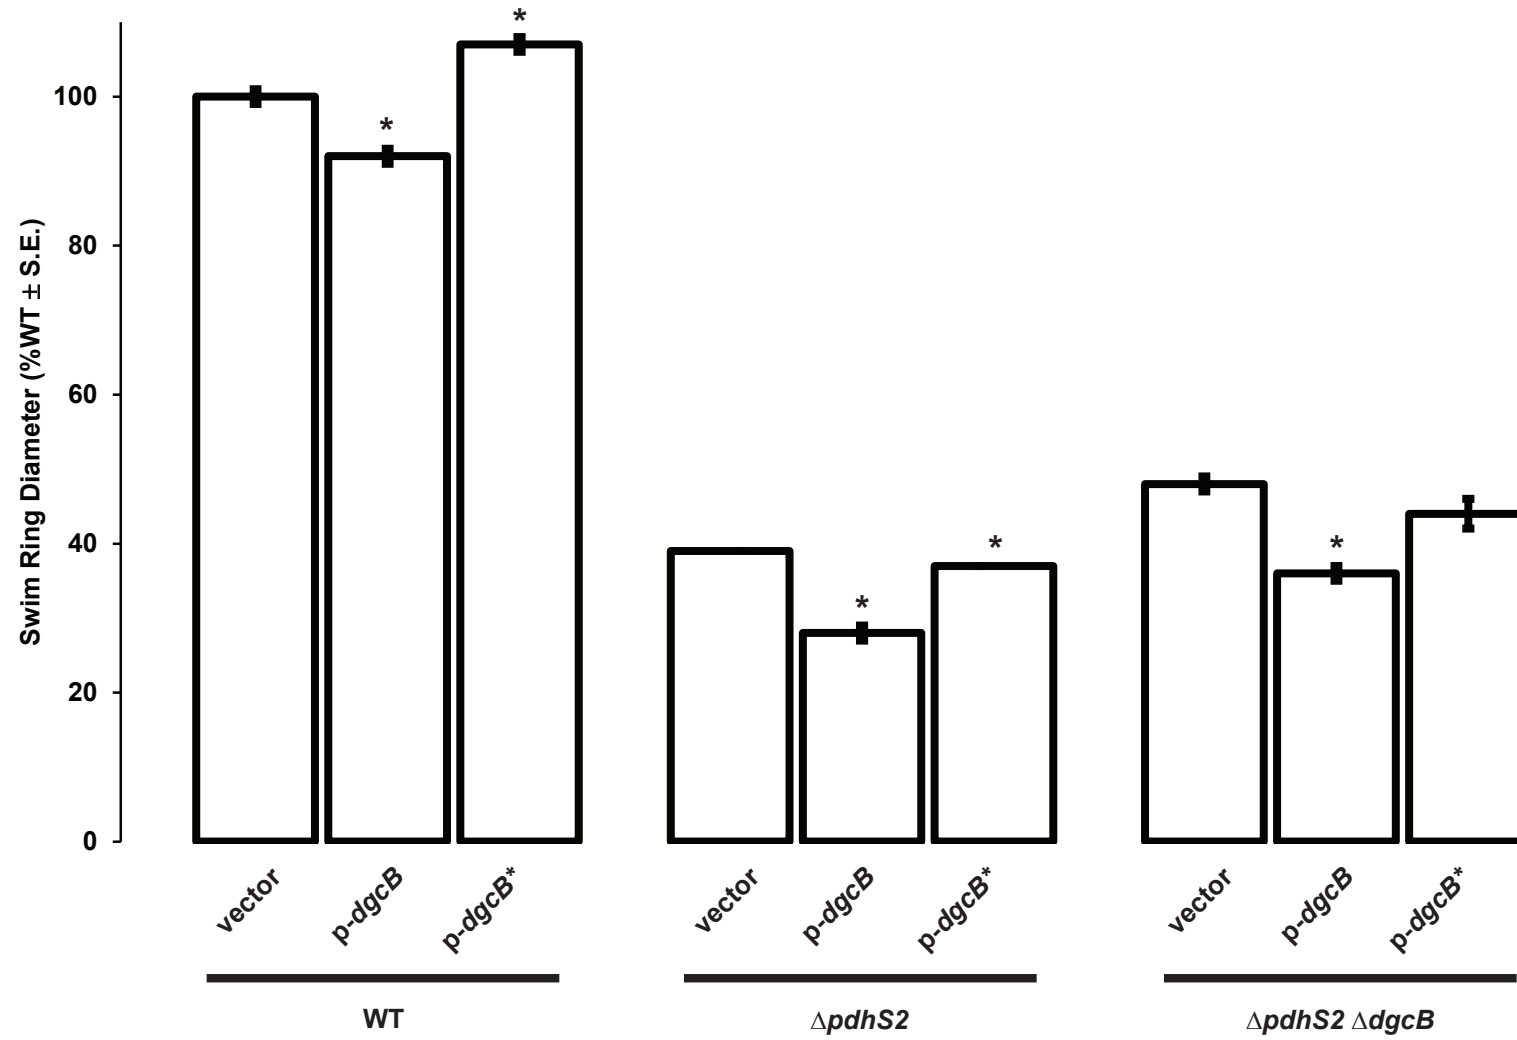

Figure S4A

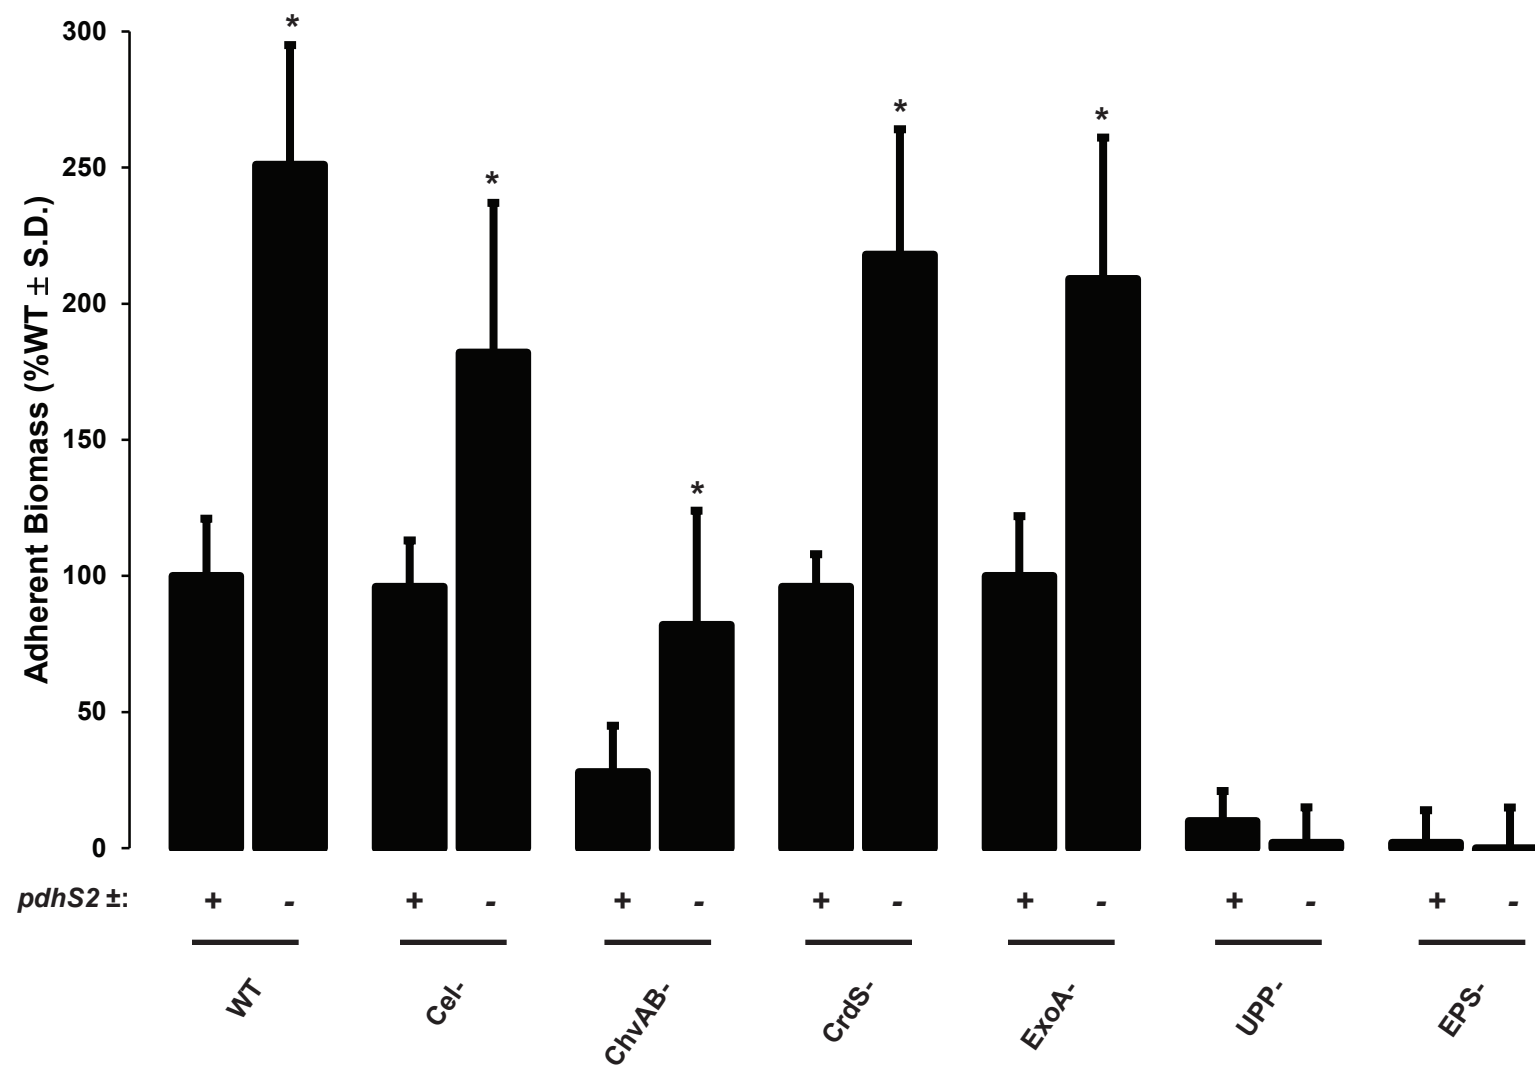

Figure S4B

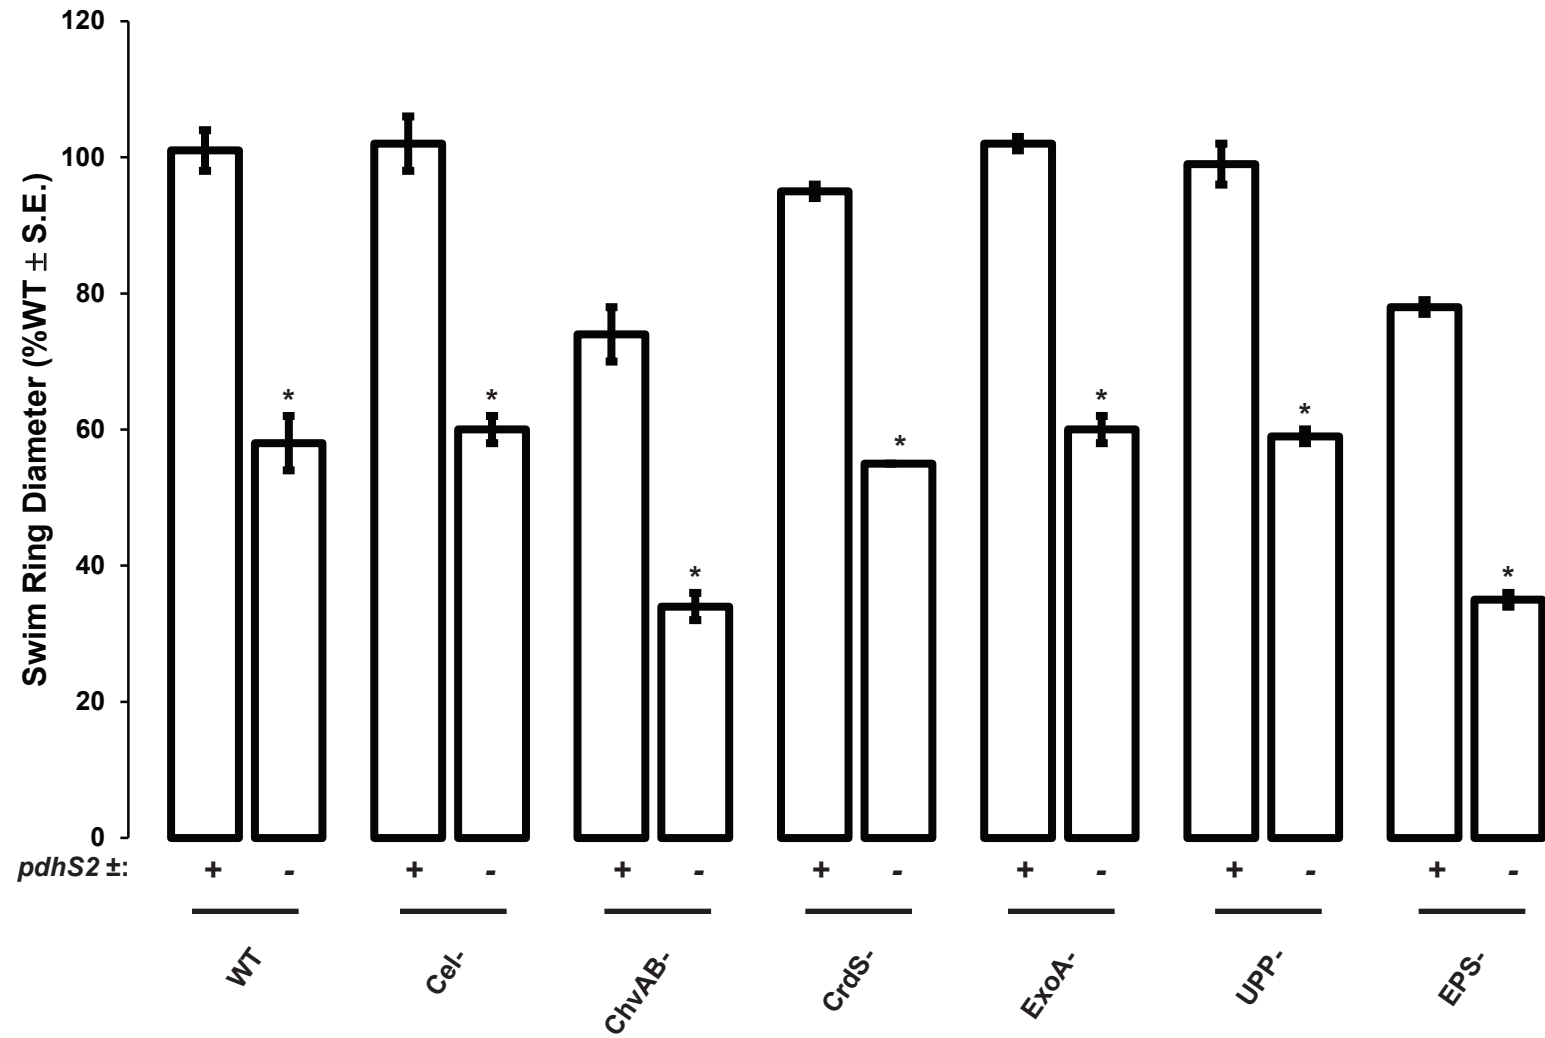

Figure S5

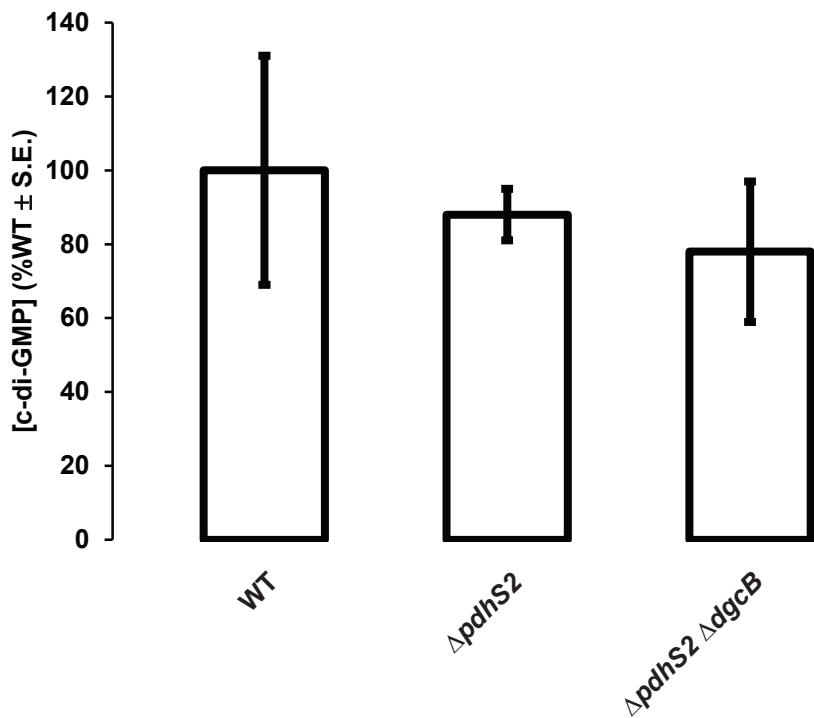



**Figure S1. A combined kinase- and phosphatase-null PdhS2 mutant allele has little effect on biofilm formation or swimming motility.** The ability of plasmid-borne expression of a kinase- and phosphatase- null allele of *pdhS2* (p-*pdhS2* (K<sup>-</sup>P<sup>-</sup>)) to complement the  $\Delta$ *pdhS2* phenotypes was compared against the wild-type *pdhS2* allele (p-*pdhS2*). Biofilm formation (black bars) and swimming motility (white bars) were evaluated as in Figure 2.

**Figure S2. The PdhS kinases are not entirely redundant in regulating biofilm formation.** Biofilm formation was evaluated in the wild-type (WT) and indicated mutant strains as described in Figure 2.

**Figure S3. PdhS2 regulation of swimming motility is independent of diguanylate cyclase activity.** (A) Swimming motility of the wild-type (WT) and indicated mutant strains was evaluated as described in Figure 2.  $P < 0.05$  compared to WT (<sup>a</sup>), *DpdhS2* (<sup>b</sup>), or corresponding diguanylate cyclase (<sup>c</sup>). (B) The effect on swimming motility of plasmid-borne expression of wild-type *dgcB* (p-*dgcB*) or a catalytic mutant allele of *dgcB* (p-*dgcB*<sup>\*</sup>) was evaluated. Expression of each *dgcB* allele was driven by the  $P_{lac}$  promoter. Biofilm formation was evaluated as described in Figure 2. (\*) =  $P < 0.05$  compared to vector alone.

**Figure S4. The unipolar polysaccharide is required for PdhS2-dependent biofilm formation.** (A) Biofilm formation was evaluated in the presence (+) or absence (-) of *pdhS2* in combination with the indicated polysaccharides. WT = wild-type, Cel<sup>-</sup> =

cellulose mutant, ChvAB<sup>-</sup> = cyclic-β-glucan mutant, CrdS<sup>-</sup> = curdlan mutant, ExoA<sup>-</sup> = succinoglycan mutant, UPP<sup>-</sup> = unipolar polysaccharide mutant, EPS<sup>-</sup> = mutant lacking all of the above polysaccharides. (B) Swimming motility was evaluated in the same strains as in (A). (\*) =  $P < 0.05$  compared to background strain.

**Figure S5. PdhS2 does not affect global levels of cyclic-di-GMP.** Cyclic-di-GMP levels were measured in whole cell extracts from equivalent ODs of the indicated strains. Data are from three independent experiments (N = 3).

**Table S1. Strains used in this study**

| Species               | Strain     | Relevant Characteristics                                                                                                                                                                                         | Source     |
|-----------------------|------------|------------------------------------------------------------------------------------------------------------------------------------------------------------------------------------------------------------------|------------|
| <i>A. tumefaciens</i> | C58        | Nopaline type strain, pAtC58, pTiC58                                                                                                                                                                             | (1)        |
| <i>A. tumefaciens</i> | C58-JEH076 | $\Delta pdhS2$ ( $\Delta$ Atu1888)                                                                                                                                                                               | (2)        |
| <i>A. tumefaciens</i> | C58-JEH128 | $\Delta pdhS2$ $\Delta pleD$ ( $\Delta$ Atu1888 $\Delta$ Atu1297)                                                                                                                                                | This study |
| <i>A. tumefaciens</i> | C58-JEH130 | $\Delta pdhS2$ $\Delta dgcA$ ( $\Delta$ Atu1888 $\Delta$ Atu1257)                                                                                                                                                | This study |
| <i>A. tumefaciens</i> | C58-JEH131 | $\Delta pdhS2$ $\Delta dgcB$ ( $\Delta$ Atu1888 $\Delta$ Atu1691)                                                                                                                                                | This study |
| <i>A. tumefaciens</i> | C58-JEH132 | $\Delta pdhS2$ $\Delta dgcC$ ( $\Delta$ Atu1888 $\Delta$ Atu2179)                                                                                                                                                | This study |
| <i>A. tumefaciens</i> | C58-JEH146 | $\Delta pdhS2$ $\Delta crdS$ $\Delta chvAB$ $\Delta cel$ $\Delta upp$ $\Delta exoA$ ( $\Delta$ Atu1888 $\Delta$ Atu3055-3057 $\Delta$ Atu2728-2730 $\Delta$ Atu3302-8187 $\Delta$ Atu1235-1240 $\Delta$ Atu4053) | This study |
| <i>A. tumefaciens</i> | C58-JEH147 | $\Delta pdhS2$ $\Delta upp$ ( $\Delta$ Atu1888 $\Delta$ Atu1235-1240)                                                                                                                                            | This study |
| <i>A. tumefaciens</i> | C58-JEH148 | $\Delta pdhS2$ $\Delta cel$ ( $\Delta$ Atu1888 $\Delta$ Atu3302-8187)                                                                                                                                            | This study |

|                       |            |                                                                                                                                                                                           |            |
|-----------------------|------------|-------------------------------------------------------------------------------------------------------------------------------------------------------------------------------------------|------------|
| <i>A. tumefaciens</i> | C58-JEH149 | $\Delta pdhS2 \Delta crdS$ ( $\Delta$ Atu1888<br>$\Delta$ Atu3055-3057)                                                                                                                   | This study |
| <i>A. tumefaciens</i> | C58-JEH150 | $\Delta pdhS2 \Delta chvAB$ ( $\Delta$ Atu1888<br>$\Delta$ Atu2728-Atu2730)                                                                                                               | This study |
| <i>A. tumefaciens</i> | C58-JEH151 | $\Delta pdhS2 \Delta exoA$ ( $\Delta$ Atu1888<br>$\Delta$ Atu4053)                                                                                                                        | This study |
| <i>A. tumefaciens</i> | C58-JEH153 | $\Delta divK \Delta pdhS2$ ( $\Delta$ Atu1296<br>$\Delta$ Atu1888)                                                                                                                        | This study |
| <i>A. tumefaciens</i> | C58-JW7    | $\Delta divK$ ( $\Delta$ Atu1296)                                                                                                                                                         | (2)        |
| <i>A. tumefaciens</i> | C58-JW8    | $\Delta pleD$ ( $\Delta$ Atu1297)                                                                                                                                                         | (2)        |
| <i>A. tumefaciens</i> | C58-JX100  | $\Delta crdS$ ( $\Delta$ Atu3055-3057)                                                                                                                                                    | (3)        |
| <i>A. tumefaciens</i> | C58-JX101  | $\Delta chvAB$ ( $\Delta$ Atu2728-2730)                                                                                                                                                   | (3)        |
| <i>A. tumefaciens</i> | C58-JX102  | $\Delta cel$ ( $\Delta$ Atu3302-8187)                                                                                                                                                     | (3)        |
| <i>A. tumefaciens</i> | C58-JX111  | $\Delta crdS \Delta chvAB \Delta cel \Delta upp \Delta exoA$<br>( $\Delta$ Atu3055-3057 $\Delta$ Atu2728-2730<br>$\Delta$ Atu3302-8187 $\Delta$ Atu1235-1240<br>$\Delta$ Atu4053; "EPS-") | (3)        |
| <i>A. tumefaciens</i> | C58-JX125  | $\Delta dgcA$ ( $\Delta$ Atu1257)                                                                                                                                                         | (4)        |
| <i>A. tumefaciens</i> | C58-JX187  | $\Delta dgcB$ ( $\Delta$ Atu1691)                                                                                                                                                         | (4)        |
| <i>A. tumefaciens</i> | C58-MLL2 A | $\Delta exoA$ ( $\Delta$ Atu4053)                                                                                                                                                         | (5)        |
| <i>A. tumefaciens</i> | C58-PMM26  | $\Delta upp$ ( $\Delta$ Atu1235-1240)                                                                                                                                                     | (3)        |

|                       |                     |                                                                                                                                                                                                                                                                                          |                          |
|-----------------------|---------------------|------------------------------------------------------------------------------------------------------------------------------------------------------------------------------------------------------------------------------------------------------------------------------------------|--------------------------|
| <i>A. tumefaciens</i> | C58-YW010           | $\Delta dgcC$ ( $\Delta$ Atu2179)                                                                                                                                                                                                                                                        | (4)                      |
|                       |                     |                                                                                                                                                                                                                                                                                          |                          |
| <i>E. coli</i>        | S17-1 $\lambda$ pir | RK2 <i>tra</i> regulon, <i>pir</i> , host for <i>pir</i> -dependent plasmids                                                                                                                                                                                                             | (6)                      |
| <i>E. coli</i>        | TOP10 F'            | F' { <i>lacI</i> <sup>q</sup> Tn10 (Tet <sup>R</sup> )} <i>mcrA</i> $\Delta$ ( <i>mrr</i> - <i>hsdRMS-mcrBC</i> ) $\Phi$ 80 <i>lacZ</i> $\Delta$ M15 $\Delta$ <i>lacX74</i> <i>recA1</i> <i>araD139</i> $\Delta$ ( <i>ara-leu</i> )7697 <i>galU</i> <i>rpsL</i> <i>endA1</i> <i>nupG</i> | Thermo Fisher Scientific |

**Table S2. Plasmids used in this study**

| Plasmid name       | Relevant characteristics                                                                                                             | Source           |
|--------------------|--------------------------------------------------------------------------------------------------------------------------------------|------------------|
| pGEM-T Easy        | PCR cloning vector; Amp <sup>R</sup>                                                                                                 | Promega          |
| p <i>lacZ</i> /290 | Broad host range plasmid carrying promoterless <i>lacZ</i> for transcriptional fusions; Tet <sup>R</sup>                             | (7)              |
| pNPTS138           | colE1 origin; <i>sacB</i> ; Km <sup>R</sup>                                                                                          | gift of M. Alley |
| pRA301             | Broad host range plasmid carrying promoterless <i>lacZ</i> for translational fusions; Spec <sup>R</sup>                              | (8)              |
| pSRKKm-tdTomato    | pSRKKm vector with <i>tdTomato</i>                                                                                                   | gift of P. Brown |
| pSRKGm             | Broad host range vector containing P <sub><i>lac</i></sub> ; <i>lacI</i> <sup>q</sup> ; <i>lacZ</i> α <sup>+</sup> ; Gm <sup>R</sup> | (9)              |
| p <i>ctrA</i> 290  | p <i>lacZ</i> /290 derivative with <i>C. crescentus ctrA</i> promoter                                                                | (10)             |
| pDC001             | pGEM-T Easy with full-length <i>pdhS2</i> <sup>(CA811-812GC,</sup>                                                                   | This study       |

|         |                                                                                                                          |            |
|---------|--------------------------------------------------------------------------------------------------------------------------|------------|
|         | A823G) ( <i>PdhS2</i> <sup>His271A,Thr275Ala</sup> mutant)                                                               |            |
| pDC002  | pSRKGm with full-length <i>pdhS2</i> <sup>(CA811-812GC, A823G)</sup> ( <i>PdhS2</i> <sup>His271A,Thr275Ala</sup> mutant) | This study |
| pGZ22   | <i>placZ</i> 290 derivative with <i>C. crescentus ccrM</i> promoter                                                      | (11)       |
| pJEH026 | pSRKGm with full-length <i>pdhS2</i>                                                                                     | (2)        |
| pJEH021 | pGEM-T Easy with full-length <i>pdhS2</i>                                                                                | (2)        |
| pJEH040 | pNPTS138 derivative with <i>pdhS2</i> SOE deletion fragment                                                              | (2)        |
| pJEH052 | pGEM-T Easy with <i>pdhS2</i> lacking a stop codon                                                                       | This study |
| pJEH053 | pGEM-T Easy with <i>gfpmut3</i>                                                                                          | This study |
| pJEH054 | pGEM-T Easy with <i>divJ</i> lacking a stop codon                                                                        | This study |

|         |                                                                                                               |            |
|---------|---------------------------------------------------------------------------------------------------------------|------------|
| pJEH060 | pSRKGm with a<br><i>pdhS2::gfpmut3</i><br>translational fusion                                                | This study |
| pJEH078 | pSRKGm with a<br><i>divJ::gfpmut3</i> translational<br>fusion                                                 | This study |
| pJEH091 | pGEM-T Easy with full-<br>length <i>pdhS2</i> <sup>(CA811-812GC)</sup><br>(PdhS2 <sup>His271Ala</sup> mutant) | This study |
| pJEH092 | pSRKGm with full-length<br><i>pdhS2</i> <sup>(CA811-812GC)</sup><br>(PdhS2 <sup>His271Ala</sup> mutant)       | This study |
| pJEH099 | pGEM-T Easy with full-<br>length <i>pdhS2</i> <sup>(A823G)</sup><br>(PdhS2 <sup>Thr275Ala</sup> mutant)       | This study |
| pJEH102 | pSRKGm with full-length<br><i>pdhS2</i> <sup>(A823G)</sup><br>(PdhS2 <sup>Thr275Ala</sup> mutant)             | This study |
| pJEH113 | pGEM-T Easy with A.<br><i>tumefaciens ccrM</i><br>promoter                                                    | This study |
| pJEH115 | pGEM-T Easy with A.<br><i>tumefaciens ctrA</i> promoter                                                       | This study |



|         |                                                                                                   |            |
|---------|---------------------------------------------------------------------------------------------------|------------|
| pJEH119 | pGEM-T Easy with A.<br><i>tumefaciens pdhS1</i><br>promoter                                       | This study |
| pJEH121 | pRA301 with A.<br><i>tumefaciens ccrM</i><br>promoter                                             | This study |
| pJEH122 | pRA301 with A.<br><i>tumefaciens ctrA</i> promoter                                                | This study |
| pJEH124 | pRA301 with A.<br><i>tumefaciens pdhS1</i><br>promoter                                            | This study |
| pJEH125 | pGEM-T Easy with<br><i>pdhS2</i> <sup>(CA811-812GC)</sup> for C-<br>terminal fusions              | This study |
| pJEH126 | pGEM-T Easy with<br><i>pdhS2</i> <sup>(A823G)</sup> for C-terminal<br>fusions                     | This study |
| pJEH127 | pSRKKm with <i>pdhS2</i> <sup>(CA811-<br/>812GC)</sup> :: <i>tdTomato</i><br>translational fusion | This study |
| pJEH128 | pSRKKm with<br><i>pdhS2</i> <sup>(A823G)</sup> :: <i>tdTomato</i><br>translational fusion         | This study |

|        |                                                                                                     |      |
|--------|-----------------------------------------------------------------------------------------------------|------|
| pJS70  | <i>placZ</i> 290 derivative with<br><i>C. crescentus pilA</i><br>promoter                           | (12) |
| pJX158 | pRA301 with <i>A.</i><br><i>tumefaciens</i> Atu3318<br>promoter                                     | (4)  |
| pJX162 | pRA301 with <i>A.</i><br><i>tumefaciens dgcB</i><br>promoter                                        | (4)  |
| pJX520 | pSRKGm with full-length<br><i>dgcB</i>                                                              | (4)  |
| pJX521 | pSRKGm with full-length<br><i>dgcB</i> <sup>A767C, A770C</sup> (DgcB <sup>EE256-257AA</sup> mutant) | (4)  |
| pJZ383 | pPZP201 derivative with<br><i>P<sub>tac</sub>::gfpmut3</i> ; Spec <sup>R</sup>                      | (13) |

**Table S3. Primers used in this study**

| Primer | Sequence (5' – 3')                      | Use                                                                                               |
|--------|-----------------------------------------|---------------------------------------------------------------------------------------------------|
| JEH65  | GAAGAA <u>CATATG</u> AGTAAAAGCGTCAGCA   | cloning <i>pdhS2</i> with NdeI site                                                               |
| JEH85  | GATTTCGCGCGATCCCTTCGA                   | Internal primer for <i>pdhS2</i> locus                                                            |
| JEH87  | GAGCAGATGCTGGCCGGA                      | Internal primer for <i>pdhS2</i> locus                                                            |
| JEH100 | GCTCTGTTGAAGGCGGCCAA                    | External primer for <i>pdhS2</i> locus                                                            |
| JEH113 | GCCGGTTTCATGCACACGCA                    | External primer for <i>pdhS2</i> locus                                                            |
| JEH146 | GAAGAAGCTAGCGGCGAAAGACCGCGCG            | cloning <i>pdhS2</i> w/o STOP and with NheI site                                                  |
| JEH147 | GAAGAA <u>CATATG</u> AGAGAAAAAGCGGTCGCA | cloning <i>divJ</i> with NdeI site                                                                |
| JEH148 | GAAGAAGCTAGCGGCGATTTTCGCTTTCGCGG        | cloning <i>divJ</i> w/o STOP and with NheI site                                                   |
| JEH149 | GAAGAAGGTACCTTATTTGTATAGTTCATCCATGCCA   | cloning <i>gfpmut3</i> with KpnI site                                                             |
| JEH150 | GAAGAAGCTAGCATGAGTAAAGGAGAAGAACTT       | cloning <i>gfpmut3</i> with NheI site                                                             |
| JEH245 | CGTGCGCAGCTCGgcCGACATGGAA GCG           | <i>pdhS2</i> <sup>CA811-812GC</sup> mutagenesis                                                   |
| JEH246 | CGCTTCCATGTCTGgcCGAGCTGCGCACG           | <i>pdhS2</i> <sup>CA811-812GC</sup> mutagenesis                                                   |
| JEH261 | CGCACGAGCTGCGCgCGCCGCTCAACGC            | <i>pdhS2</i> <sup>A823G</sup> mutagenesis                                                         |
| JEH262 | GCGTTGAGCGGCGcGCGCAGCTCGTGCG            | <i>pdhS2</i> <sup>A823G</sup> mutagenesis                                                         |
| JEH272 | GAGCTCGGGCGAAAGACCGCCG                  | reverse primer for cloning <i>pdhS2</i> w/o STOP and with SacI site                               |
| JEH282 | <u>GGTACCT</u> GCCAGAATCGTTGCT          | cloning <i>ccrM</i> promoter region, +222 bp to -9 bp from translational start, with KpnI site    |
| JEH284 | <u>AAGCTTT</u> GCTGCCATTGGTACT          | cloning <i>ccrM</i> promoter region, +222 bp to -9 bp from translational start, with HindIII site |
| JEH285 | <u>GGTACCT</u> TAACCTTTTCGTTTACGGGCA    | cloning <i>ctrA</i> promoter region, +328 bp to -9 bp from                                        |

|        |                                      |                                                                                                    |
|--------|--------------------------------------|----------------------------------------------------------------------------------------------------|
|        |                                      | translational start, with KpnI site                                                                |
| JEH287 | <u>CTGCAGA</u> ACCCGCATAATTATCCCCTTT | cloning <i>ctrA</i> promoter region, +328 bp to -9 bp from translational start, with PstI site     |
| JEH291 | <u>GGTACC</u> ATTTGCAAGTGCCTCTT      | cloning <i>pdhS1</i> promoter region, +264 bp to -9 bp from translational start, with KpnI site    |
| JEH293 | <u>AAGCTT</u> GGCGGGCATGTCTGAAA      | cloning <i>pdhS1</i> promoter region, +264 bp to -9 bp from translational start, with HindIII site |

## REFERENCES

1. **Watson B, Currier TC, Gordon MP, Chilton MD, Nester EW.** 1975. Plasmid required for virulence of *Agrobacterium tumefaciens*. J. Bacteriol. **123**:255-264.
2. **Kim J, Heindl JE, Fuqua C.** 2013. Coordination of division and development influences complex multicellular behavior in *Agrobacterium tumefaciens*. PLoS one **8**:e56682.
3. **Xu J, Kim J, Danhorn T, Merritt PM, Fuqua C.** 2012. Phosphorus limitation increases attachment in *Agrobacterium tumefaciens* and reveals a conditional functional redundancy in adhesin biosynthesis. Research in microbiology **163**:674-84.
4. **Xu J, Kim J, Koestler BJ, Choi JH, Waters CM, Fuqua C.** 2013. Genetic analysis of *Agrobacterium tumefaciens* unipolar polysaccharide production reveals complex integrated control of the motile-to-sessile switch. Molecular microbiology **89**:929-48.
5. **Tomlinson AD, Ramey-Hartung B, Day TW, Merritt PM, Fuqua C.** 2010. *Agrobacterium tumefaciens* ExoR represses succinoglycan biosynthesis and is required for biofilm formation and motility. Microbiology **156**:2670-81.
6. **Simon R, Priefer U, Puhler A.** 1983. A broad host range mobilization system for *in vivo* genetic engineering: transposon mutagenesis in gram negative bacteria. Bio/Technology (Nature Publishing Company) **Nov.**:784-791.
7. **Gober JW, Shapiro L.** 1992. A developmentally regulated *Caulobacter* flagellar promoter is activated by 3' enhancer and IHF binding elements. Mol Biol Cell **3**:913-26.
8. **Akakura R, Winans SC.** 2002. Constitutive mutations of the OccR regulatory protein affect DNA bending in response to metabolites released from plant tumors. J. Biol. Chem. **277**:5866-74.
9. **Khan SR, Gaines J, Roop RM, 2nd, Farrand SK.** 2008. Broad-host-range expression vectors with tightly regulated promoters and their use to examine the influence of TraR and TraM expression on Ti plasmid quorum sensing. Appl Environ Microbiol **74**:5053-62.
10. **Domian IJ, Reisenauer A, Shapiro L.** 1999. Feedback control of a master bacterial cell-cycle regulator. Proceedings of the National Academy of Sciences of the United States of America **96**:6648-53.
11. **Stephens CM, Zweiger G, Shapiro L.** 1995. Coordinate cell cycle control of a *Caulobacter* DNA methyltransferase and the flagellar genetic hierarchy. Journal of bacteriology **177**:1662-9.
12. **Skerker JM, Shapiro L.** 2000. Identification and cell cycle control of a novel pilus system in *Caulobacter crescentus*. The EMBO journal **19**:3223-34.
13. **Ramey BE, Matthysse AG, Fuqua C.** 2004. The FNR-type transcriptional regulator SinR controls maturation of *Agrobacterium tumefaciens* biofilms. Molecular microbiology **52**:1495-1511.
